# Supplementary material for: Carbonate-hosted microbial communities are prolific and pervasive methane oxidizers at geologically diverse marine methane seep sites
Source: PubMed Central journal article supplement — Proc Natl Acad Sci U S A. 2021 Jun 14;118(25):e2006857118. doi: 10.1073/pnas.2006857118 (PMC8237665; doi:10.1073/pnas.2006857118), 2021-06-14
Supplement: pnas.2006857118.sapp.pdf [file pnas.2006857118.sapp.pdf]

## Supporting Information for

# Carbonate-hosted microbial communities are prolific and pervasive methane oxidizers at geologically diverse marine methane seep sites

Jeffrey J. Marlow<sup>1^\*</sup>, Daniel Hoer<sup>1</sup>, Sean Jungbluth<sup>2</sup>, Linda Reynard<sup>3‡</sup>, Amy Gartman<sup>4</sup>, Marko S. Chavez<sup>5</sup>, Mohamed Y. El-Naggar<sup>5,6,7</sup>, Noreen Tuross<sup>3</sup>, Victoria J. Orphan<sup>8</sup>, and Peter Girguis<sup>1\*</sup>

<sup>1</sup> Department of Organismic and Evolutionary Biology, Harvard University, Cambridge, MA, USA.

<sup>2</sup> Department of Energy, Joint Genome Institute, Walnut Creek, CA, USA.

<sup>3</sup> Department of Human Evolutionary Biology, Harvard University, Cambridge, MA, USA.

<sup>4</sup> U.S. Geological Survey, Santa Cruz, CA, USA.

<sup>5</sup> Department of Physics and Astronomy, University of Southern California, Los Angeles, CA, USA.

<sup>6</sup> Department of Chemistry, University of Southern California, Los Angeles, CA, USA.

<sup>7</sup> Department of Biological Sciences, University of Southern California, Los Angeles, CA, USA.

<sup>8</sup> Division of Geological and Planetary Sciences, California Institute of Technology, Pasadena, CA, USA.

<sup>^</sup>: Current Address: Department of Biology, Boston University, Boston, MA, USA.

<sup>‡</sup>: Current Address: Department of Geosciences, Boise State University, Boise, ID, USA.

<sup>\*</sup>: To whom correspondence should be addressed: [jjmarlow@bu.edu](mailto:jjmarlow@bu.edu), [pgirguis@oeb.harvard.edu](mailto:pgirguis@oeb.harvard.edu)

Keywords: Methane oxidation, Metabolic rates, Endolith, Methane seep

## 1 **Materials and Methods**

### 3 Study Sites and Sample Recovery

#### 5 *Gulf of Mexico*

6 The Gulf of Mexico occupies an ancient rift basin, formed between ~120-200 million years  
7 ago, which has experienced extensive salt deposition, episodes of carbonate reef formation, and  
8 burial caused by continental runoff (1). The high organic loading and porous underlying source  
9 rock make the region a hydrocarbon-rich basin of high economic interest. Mississippi Canyon is  
10 a well-established site of shallow subsurface hydrate deposition and methane and hydrocarbon  
11 seepage (2–4). During Deep-Submergence Vehicle (DSV) *Alvin* dives 4680 and 4682 of *Atlantis*  
12 leg AT 26-12-SVC in March 2014, three carbonate rocks and one push core were collected.  
13 Rocks GoM R1 (25x22x12 cm) and GoM R2 (14x10x8 cm) were gray conglomerates cemented  
14 by fine-grained matrix; these samples had few visible conduits and were recovered from a small  
15 (~1.5 m tall) carbonate mound with intermittent patches of microbial mat (Fig. S1). Rocks GoM  
16 R3 and GoM R4 were tan-colored, platy, more cohesive samples approximately 16x12x4 cm and  
17 21x10x5 cm in size, respectively, collected from fractured carbonate pavement underlain by  
18 methane hydrate. Push cores GoM PC1 and PC2, recovered from the base of the mound,  
19 exhibited fine gray sediment with a dark gray / black horizon between ~6-10 cm depth. During  
20 sample processing, all rocks were found to emit small quantities of viscous black oil. (See Fig.  
21 S1 for site context and sample images; not all *in situ* locations are shown due to video recording  
22 challenges during the *Alvin* Science Verification Cruise.)

#### 24 *U.S. Atlantic Margin*

25 The United States Atlantic margin (USAM) was initiated as a rift zone in the Mesozoic that  
26 divided the Pangean supercontinent; subsequent diachronous detachment, spreading, and  
27 volcanic overprinting led to distinct faulting and petrological characteristics along eastern North  
28 America (5). As the type case of a passive margin, the dominant geological forces since the  
29 Pliocene have been sedimentation and canyon formation (6). The absence of both active  
30 subsidence and hydrocarbon basin context made the observation of pervasive seepage a surprise  
31 (7). Using backscatter data, 570 gas plumes between Cape Hatteras and Georges Bank were  
32 detected in 2014, most of which were associated with high relief portions of submarine canyons.  
33 The seepage was attributed to “stranded” hydrate deposits upslope of a deepening gas hydrate  
34 stability zone (7).

35 Veatch Canyon and New England Seep 2 were detected by backscatter data (7) and  
36 subsequently investigated by the remotely operated vehicle (ROV) *Deep Discoverer*, which  
37 confirmed bubble ebullition, *Bathymodiolus* clams, and, at New England Seep 2, exposed  
38 methane hydrate (8). During *Atlantis* expedition AT 36 in July and August of 2016, water  
39 column backscatter data revealed five actively emitting gas seeps at the New England Seep area  
40 and 13 at Veatch Canyon, while enhanced porewater sulfide concentrations and the recovery of  
41 putative sulfur oxidizing 16S rRNA genes suggested a dynamic sulfur cycle co-localized with  
42 seepage activity (9). DSV *Alvin* dives 4828 and 4835 visited Veatch Canyon, while dives 4833  
43 and 4834 targeted New England Seep 2.

44 At Veatch Canyon, sample VC R1 was collected from a bed of bivalves coated with white  
45 microbial mat, both of which are strongly suggestive of chemosynthetic activity (Fig. S2A-B).

46 Sample VC R2 was recovered from the outer edge of a carbonate outcrop at a site that did not  
47 exhibit standard manifestations of methane seepage. Shards of bivalve shells and brown, mat-  
48 free sediment cover characterized the site (Fig. S2C-D). At New England Seep 2, sample NES  
49 R1 was obtained approximately 1m from an extensive white microbial mat; bivalves were scarce  
50 and active bubbling was not observed (Fig. S2E). Sample NES R2 was recovered from a broad,  
51 sediment-laden trough with intermittent carbonate fragments (Fig. S2F-G), several dozen meters  
52 from the nearest surface expression of seepage.

53

#### 54 *Guaymas Basin*

55 The Guaymas Basin in the central Gulf of California is a young marginal rift basin marked  
56 by the co-occurrence of active seafloor spreading and the input of abundant organics from the  
57 overlying water column. Magmatic intrusions thermally alter these sediments to generate fluids  
58 rich in organic acids, ammonia, carbon dioxide, and methane and higher hydrocarbons (10–13).  
59 AOM was previously detected in laboratory incubations using sediment horizons a few  
60 centimeters beneath pervasive orange and white sulfide oxidizing microbial mats (14, 15).  
61 Several ANME and SRB lineages were abundant, including thermotolerant ANME-1-Guaymas  
62 methanotrophs (16) and the HotSeep-1 sulfate reducing bacteria first detected at Guaymas (17).

63 During *Atlantis* expedition AT 37-06, two areas of extensive biological activity (as  
64 indicated by seafloor surface expressions of microbial mats, bivalves, and tubeworms) were  
65 sampled, classified here as Guaymas Basin North (GBN) and South (GBS); see Fig. S3. GBN R1  
66 was a poorly lithified rock covered with worm tubes, recovered during dive AD 4864 from the  
67 base of a rocky outcrop within a region of sparse white microbial mat (Fig. S3A). Dive AD 4867  
68 visited Guaymas-9A, an off-axis seep with shallow (<1 m) occurrences of methane hydrate.  
69 GBN R2 was a white carbonate rock covered with a thin veneer of brown sediment; the sample  
70 was collected from a rocky outcrop in a mat-free area approximately two meters from bivalve  
71 shell hash and tube worms (Fig. S3B). GBN R3 was a crumbly brown rock recovered at a depth  
72 of ~6 cm within a push core of a thick round white mat (Fig. S3C-D); hydrate was observed at  
73 ~18 cm depth beneath this feature. GBN PC1 was collected from an area where the sediment  
74 surface was covered in small worm burrows, approximately 50 cm from a patch of tube worms  
75 (Fig. S3E-F).

76 At GBS, R1 was collected from Cathedral Hill, a 5-m tall carbonate mound topped with  
77 mat-covered sulfide chimney spires and flanked by yellow, orange, and white microbial mats.  
78 GBS R1 was characterized by cm-scale holes and internal conduits, and was obtained from a  
79 plateau atop the Cathedral Hill mound marked by rocky outcrops covered with brown sediment  
80 (Fig. S3G).

81

#### 82 *California Coast*

83 Two sites of putative chemosynthetic activity were investigated along the transpressional  
84 California Borderland, a heavily fragmented active margin boundary where the Pacific and North  
85 American tectonic plates experience both compression and strike-slip dynamics (18–20). The  
86 region's hydrocarbon seepage activity, attributed to both local methanogenesis and the thermal  
87 breakdown of larger organic molecules during subduction, has been well established at sites such  
88 as Coal Oil Point (21) and the Santa Monica Basin (22).

89 The Point Dume seep field is located along the shallow-sloping base of Dume submarine  
90 canyon, approximately 8 km southwest of Malibu, CA. Following up on the 2013 recovery of  
91 vesicomid clams and a multibeam survey by the *E/V Nautilus*, a ~1.3 km-long field of white,

92 yellow, and orange microbial mats, punctuated by dozens of rounded, chimney-like constructions  
93 ~0.25-1m in height, was observed by the *ROV Hercules* during an *E/V Nautilus* cruise in August  
94 2015 (23). Subsequent sampling during NA-073 in June 2016, NA-084 in August 2017, and R/V  
95 *Falkor* leg 163 019 in October 2018 recovered sediment cores and chimney rock structures.  
96 Samples PD R1 and PD R2 were disparate samples from a seemingly contiguous structure. PD  
97 R1 was the top, rounded portion of a ~25-cm-tall chimney and was covered in orange microbial  
98 mat; PD R2 was at the base of the structure, covered in sparse white mat and a thin layer of  
99 brown sediment (Fig. S4A-B). PD R4 was a 38-cm-tall chimney structure covered in white  
100 microbial mat (Fig. S4C). PD R3 was part of a sedimented carbonate pavement at the top of the  
101 gentle slope that hosted most of the microbial mats and chimneys (Fig. S4D-E) and PD PC1 and  
102 PD PC2 were collected through white mat-covered sediment at the base of small chimney  
103 structures at different areas of the Point Dume seep complex. Fig. S5 provides additional  
104 contextual images of the extensive microbial mats and chimney fields at Point Dume.

105 The Palos Verdes shelf is directly south of Los Angeles; early investigations found evidence  
106 of subsurface gas repositories, sulfide-rich fluid, and carbonate rock hardground (24, 25) while  
107 more recent exploration surveyed shallow (~350 m depth) near-shore (<5 km) carbonate mounds  
108 associated with intermittent bubbling (26). The rock samples were collected from an area devoid  
109 of surface markers representative of active seepage: PV R1 was a sedimented crustal pavement  
110 and PV R2 was the top of a well consolidated chimney-like structure ~25 cm in height (Fig. S4F-  
111 H).

112

### 113 *Sampling and Analysis Details*

114 Dataset 1 provides details on all sampling sites and indicates which samples were used for  
115 designated analyses described in this study.

116

### 117 *Site Classification and Sample Processing*

118 At all sampling locations, the designation of an “active seep site” required observation of  
119 white microbial mats (which frequently consist of sulfide oxidizing bacteria), clam beds, and/or  
120 bubble ebullition; this classification scheme is consistent with previous biological and geological  
121 surveys of seeps around the world (27, 28). “Inactive seep sites” lacked all of these surficial  
122 manifestations of full methane perfusion of the sediment and rock column, but full methane  
123 consumption below the seafloor or temporally intermittent fluid flow cannot be ruled out.

124

### 125 Metabolic Rate Measurements at Pressure

126 To attain the desired pressure within the custom-built titanium 4L pressure chambers, a  
127 high-performance liquid chromatography pump (ChromTech, Inc.) delivered water continuously  
128 at 30 mL min<sup>-1</sup>, and when bubbles were no longer observed in the outflow, vessel pressure was  
129 increased to the targeted value (7.58 MPa). Pressure readings were provided by an analog  
130 bourdon-style pressure gauge on the outlet of the vessel, as well as on the high-pressure pump  
131 itself. Once the target pressure was achieved, the pump was stopped, and high-pressure needle  
132 valves on the inlet and outlet fluid lines were immediately closed, isolating the vessel and  
133 holding it at the desired pressure. The analog pressure gauge was plumbed between the lid of the  
134 vessel and the valve sealing the outflow line, which allowed confirmation and monitoring of the  
135 vessel pressure throughout the experiment. Experimental duration was calculated to minimize the  
136 proportion of available methane consumed and thereby enable relatively consistent exergonic  
137 driving force throughout the incubation. Experiments at saturated methane concentrations

138 proceeded for one day, while those with a range of methane partial pressures ran for 8 hours. At  
139 the designated end point, the pressure in the vessel was vented, the lid was removed, and the  
140 experimental Mylar™ bags were extracted. In the anoxic chamber, water was collected for D/H  
141 analysis via sterile syringe through the bag and processed and measured as described above.

#### 142 Anaerobic Oxidation of Methane Rate Comparisons

143 By conducting an extensive review of previously published AOM rates, we sought to  
144 contextualize our experimental results and better understand how endolithic AOM from both  
145 active and inactive seep sites compared with sediment-hosted processes. Given the aim of  
146 evaluating naturally occurring methane oxidizing potential, only unmodified environmental  
147 samples were considered in this analysis; enrichment cultures were excluded. Studies using  
148 methane-dependent sulfide production as a proxy for AOM were not included, as this parameter  
149 can be decoupled from methane oxidation (29, 30).

150 For each previously published study, the highest reported rate was first converted to nmol  
151 methane oxidized / cm<sup>3</sup> d (see Dataset 2). These values were normalized to the methane  
152 concentration used in our long-term incubation experiments (1.1 mM, determined using a  
153 temperature-adjusted Henry's law constant of 5.7 x 10<sup>-6</sup> (31)) using equation 1 (32):  
154

$$155 \frac{V_2}{V_1} = \frac{C_2 (K_M + C_1)}{C_1 (K_M + C_2)} \quad \text{Eq. 1}$$

156 In this formulation,  $V$  represents the measured or calculated rate of AOM (nmol methane / cm<sup>3</sup>  
157 d);  $C$  signifies the methane concentration (mM);  $K_M$  stands for the substrate concentration at  
158 which the reaction rate is half of its maximum (mM); and subscripts 1 and 2 represent the  
159 parameters at the lower and higher methane concentrations, respectively.  $K_M$  values for AOM by  
160 environmental communities are poorly constrained. Two empirical efforts to determine  $K_M$  in an  
161 Eckernförde Bay sediment enrichment (29) and Hydrate Ridge seep sediment (32) did not attain  
162 a  $V_{max}$ , meaning that only a poorly constrained lower bound can be established; these were 1.1  
163 and 7.9 mM, respectively. High-pressure incubations of mud volcano sediment produced a  
164 sparsely populated AOM kinetic curve from which a  $K_M$  of 37 mM was calculated (33). *In vitro*,  
165 MCR from the methanogen *M. marburgensis* oxidized methane with a  $K_M$  of ~10 mM (34).  
166 Perhaps the most analogous data come from high-rate data from Bowles et al. (35), where Gulf  
167 of Mexico and Guaymas Basin seep sediments exhibited AOM values of 4800 and 3600 nmol /  
168 cm<sup>3</sup> d, respectively. The corresponding  $K_M$  values were estimated to be 11 mM and 8,  
169 respectively.

170 Given this dearth of suitable values for AOM mesocosms, we calculated  $K_M$  from Point  
171 Dume seep sediment subjected to high pressure (1100 psi) and a range of methane concentrations  
172 (1.1-129 mM). Based on a linear interpolation between the data points bounding  $V_{max} / 2$ , the  $K_M$   
173 was calculated to be 5.65 mM. There is likely a degree of sample-to-sample variation in kinetic  
174 parameters, but our measured value is on the lower end of proposed  $K_{MS}$  and lower  $K_M$  bounds,  
175 making for conservative comparisons (i.e., producing higher normalized rate values for initial  
176 studies whose initial concentrations were > 1.1 mM; see Dataset 2).

#### 177 Conductance Measurements

178 Before probing the samples, and in between probing each individual sample, the probe tips  
179 were rinsed with isopropyl alcohol followed with deionized water, and then dried with

183 compressed air. To achieve a probe tip separation on the order of tens of microns, a 40  $\mu\text{m}$   
184 diameter wire, measured with digital calipers, was placed across the sample and the two probes  
185 used were positioned roughly on either side of the wire. The wire was then removed once the  
186 probes were properly in position. This probe separation distance was chosen because it was  
187 roughly the distance that spatially separated, but potentially electrically connected, ANME-SRB  
188 aggregates appeared in fluorescence microscopy analyses.

## 189 190 Microscopy

191 To minimize image blurring caused by water movement during long-duration scans, the  
192 fragment was attached to the bottom of a small dish with autoclaved clay. Laser power, scan  
193 rates, and gain settings were set to minimize background signal; images were acquired and  
194 stitched together with Zeiss' ZEN software. (Any use of trade, firm, or product names is for  
195 descriptive purposes only and does not imply endorsement by the U.S. Government.) Because  
196 background minimization settings were optimized for each field of view, some edge effects  
197 between fields of view are present.

198 Two fields of view are shown in Fig. S8 with identical instrumental and image analysis  
199 parameters as in Fig. 3. The substantially brighter emission across the Cy3 and FAM6 spectral  
200 windows seen in the experimental samples (Fig. 3) increases our confidence that the signal is due  
201 to phylogenetically resolved microorganisms rather than background fluorescence.

## 202 203 Microbial Community Analysis

### 204 205 *DNA Extraction, SSU rRNA Gene Amplification, and Illumina Sequencing*

206 To prepare samples for DNA extraction, rocks were powdered (to the approximate particle  
207 size of sediment samples) with a sterile ceramic mortar and pestle. Mortar and pestle were  
208 washed with bleach, ethanol, and DI H<sub>2</sub>O prior to autoclaving between each use. The extraction  
209 protocol was modified by bead beating and incubating the samples (4.5 m/s followed by 5 mins  
210 at 70° C) twice upon addition of the lysis buffer. Following PCR validation (including positive  
211 and negative controls) with the 27F and 1492R primers (36), target regions were amplified using  
212 515yF and 806bR primers modified to include the Illumina flowcell adapter sequences (37).  
213 Forward primers contained an additional 8-bp barcode to assign individual sequences to specific  
214 samples. Each 25  $\mu\text{l}$  PCR reaction was prepared in OneTaq 2x Master Mix (NEB, Ipswich, MA)  
215 with 2  $\mu\text{l}$  of 5  $\mu\text{M}$  forward and reverse primers and 1  $\mu\text{l}$  of genomic DNA template. PCR cycling  
216 conditions consisted of an initial denaturation step at 94°C for 3 min, followed by 35 cycles of  
217 94°C denaturation for 45 sec, 50°C annealing for 1 min, 72°C extension for 1.5 min, and a final  
218 extension step at 72°C for 10 min. With each PCR run, a positive control with *E. coli* genomic  
219 DNA and a negative control using 1  $\mu\text{l}$  of water instead of DNA template were run.  
220 Amplification products were subsequently purified using the Aurora system (Boreal Genomics,  
221 Vancouver, BC) with the clean-up protocol delineated in the manufacturer's instructions, and  
222 quantified using the Qubit 2.0 fluorometer (Invitrogen, Carlsbad, CA). Purified amplicons were  
223 diluted to equal concentrations and were sequenced (2 x 250 bp) on an Illumina (San Diego, CA,  
224 USA) MiSeq sequencer at RTL Genomics (Lubbock, TX, USA).

### 225 226 *Read Processing, Clustering with UCLUST and Deblur, and Taxonomic Assignment*

227 Forward and reverse reads were merged together using PEAR (38) with default parameters.  
228 Quality-trimming of the reads was performed using a custom tool developed at RTL Genomics

229 to trim reads with a sliding window approach to trim at the last base where the total average is  
230 greater than 25. Sample-specific barcoded regions, represented by the first eight base pairs of  
231 sequence, were manually removed. Removal of chimeric sequences was performed using  
232 USEARCH v7.0.1090 (39) to screen quality-filtered paired reads based on matches to a version  
233 of the SILVA v128 SSURef database (40) expunged of all sequences with pintail quality <50  
234 and alignment quality <75.

235 Sequence clustering at 97% identity was performed with UCLUST (v1.2.22q; (39)) in  
236 QIIME (v1.9.1; (41)) on all non-chimeric paired-end reads. The most abundant sequences in  
237 each cluster were selected as the representative sequences, which were then assigned taxonomy  
238 in QIIME using `assign_taxonomy.py` and the chimera-screened SILVA v128 SSURef database  
239 described above with parameters “similarity: 0.9”, “uclust\_max\_accepts: 10”, and  
240 “min\_consensus\_fraction: 0.90”.

241

#### 242 *Single Nucleotide Resolution Approaches*

243 Three methods – UCLUST, Deblur, and DADA2 – were assessed for their ability to produce  
244 error-free sequence clusters. Sequence clustering with Deblur (v1.0.3; (42)) was performed in  
245 “workflow” mode with parameter “t=247”; Deblur employs VSEARCH (v2.6.0; (43)),  
246 SortMeRNA (v2.0; (44)), and MAFFT (v7.310; (45)) to perform clustering. All Deblur clusters  
247 were assigned taxonomy as described above.

248 Unpaired forward and reverse reads with primers removed were used as input into DADA2  
249 (v1.6.0; (46)) and processed according to an online tutorial

250 (<https://benjjneb.github.io/dada2/tutorial.html>). The “filterAndTrim” script was run with  
251 parameters: “truncLen=c(240,160)”, “maxN=0”, “maxEE=c(2,2)”, “truncQ=2”,  
252 “rm.phix=TRUE”. Chimeric sequences were removed using the “removeBimeraDenovo” script  
253 using the “consensus” method. Taxonomic assignment of sequences was performed using the  
254 “assignTaxonomy” script and the “silva\_nr\_v128\_train\_set.fa” database provided with DADA2.

255 To evaluate the fidelity of error-free sequence cluster generation, all sequences representing  
256 clusters from the different clustering methods were compared using BLAST (parameters: e-value  
257 1e-5, max\_target\_seqs 1) to the chimera-checked SILVA v128 database described above. Deblur  
258 was chosen as the clustering method because it resulted in the fewest number of mismatches to  
259 the target database (Fig. S9).

260

#### 261 *Alpha and Beta Diversity*

262 To prepare for using the “Phylogenetic Diversity PD” metric, all Deblur clusters were  
263 aligned using MUSCLE (v3.8.31; (47)) and a phylogeny was generated using FastTree (v2.1.3;  
264 (48)) with default parameters. Alpha diversity metrics (i.e., Observed Species, Whole Tree PD,  
265 and Chao1) were all calculated in QIIME using the `alpha_diversity.py` script and samples  
266 rarefied to an even sampling depth (n=2658 sequences).

267 Non-metric multi-dimensional scaling analysis (NMDS) was performed in QIIME using the  
268 scripts `beta_diversity_through_plots.py` and `nmads.py` with multiple diversity metrics: Bray-  
269 Curtis, binary Jaccard, and unweighted UniFrac. Unweighted diversity metrics were applied  
270 because DADA2 had not been benchmarked for use in weighted analyses at the time of analysis.  
271 Sequences were not rarefied to an even sampling depth prior to analysis.

272

#### 273 *Community Statistical Analysis*

274 Statistical analyses were performed using paired reads rarefied to an even depth across all  
275 samples (n=2658 reads). Comparisons by location, lithology, mineralogy, and methane oxidation  
276 rates were explored using PERMANOVA tests (1000 permutations) with the QIIME script  
277 `compare_categories.py` (Table S6). Dissimilarity between microbial diversity and community  
278 structure and associated methane oxidation rates was explored using Mantel tests with 1000  
279 replications performed in QIIME using the scripts `distance_matrix_from_mapping.py` and  
280 `compare_distance_matrices.py` (Table S7).

### 281 282 *Phylogenetic Analysis*

283 All Deblur clusters that were found in  $\geq 5\%$  abundance in any single sample (n=32) were  
284 manually queried through NCBI BLAST (49) on November 18, 2017 (default parameters), to  
285 identify closest database matches. The single best match for each sequence was identified using  
286 the following criteria, which were employed sequentially in the event of a tie: 1) top bitscore  
287 match, 2) top similarity percent, 3) preference for sequences derived from isolates, 4) first clone  
288 published with an accompanying (i.e., citable) manuscript, 5) preference for clones generated by  
289 the corresponding study's lead author, and 6) no requirement for a citable manuscript. The search  
290 revealed 32 unique sequences, which were aligned with the 32 Deblur cluster sequences using  
291 the online SINA aligner (v1.2.11; (50)). Alignment positions corresponding to ends extending  
292 beyond the range of the amplicon were removed and a phylogeny was constructed in ARB  
293 (v6.0.4; (51)) using RAxML (v7.7.2; (52)) with the GTR model of nucleotide substitution under  
294 the gamma- and invariable- models of rate heterogeneity, and selecting the best tree from 100  
295 replicate runs. The phylogeny and associated abundance data were visualized using R (v3.4.1;  
296 (53)) and the `heatmap` package (v1.0.8).

### 297 298 *Data Archiving*

299 Sample metadata and the SSU rRNA sequence files used in this study were submitted to the  
300 NCBI BioSample and Sequence Read Archive databases and are accessible via BioProject  
301 identifier PRJNA648152.

## 302 303 **Supplementary Text**

### 304 305 Calculating Methane Concentrations in Incubation Experiments

306 Dissolved methane concentration is a key factor to consider when designing rate-based  
307 experiments and establishing the environmental relevance of resulting data. Gas concentration in  
308 the aqueous phase ( $c_a$ , in mol / m<sup>3</sup>) is calculated as the product of the partial pressure of the gas  
309 species under equilibrium conditions ( $p$ , in Pa) and the Henry's law constant  $H^{cp}$  (mol / m<sup>3</sup> Pa):

$$310 \quad c_a = p * H^{cp} \quad \text{Eq. 2}$$

311  
312 Henry's law constants depend on the gas and solvent species as well as temperature and salinity.  
313  $H^{cp}$  for methane under standard conditions ( $p = 101325$  Pa,  $T = 298.15$  K) in pure water was  
314 taken from an exhaustive compilation of empirical and theoretical data (31). We used the median  
315 value of 29 data points:  $1.4 \times 10^{-5}$  mol / m<sup>3</sup> Pa.

316 The temperature correction (Eq. 3) is derived from the Van't Hoff equation, which relates  
317 equilibrium values to changes in temperature ( $T$ ).  
318  
319



320 
$$H_T^{cp} = H_{298.15}^{cp} * \exp\left(\frac{d(\ln H^{cp})}{d\left(\frac{1}{T}\right)} * \left(\frac{1}{T} - \frac{1}{298.15}\right)\right)$$
 Eq. 3

321  
 322 The median value for  $d(\ln H^{cp}) / d(1/T)$ , based on 18 different studies as reported in Sander, 2015  
 323 (31), was 1600 K. The Henry's law constant at 4 °C (277.15 K), the temperature at which AOM  
 324 rate experiments were conducted, was calculated to be  $2.1 \times 10^{-5}$  mol / m<sup>3</sup> Pa.

325 Most gases exhibit decreased solubility as the salinity of the solvent is increased. The  
 326 relationship can be described with a modified Sechenov equation that accounts for mixed ion  
 327 solutions such as seawater (Eq. 4, (54)).

328  
 329 
$$\log\left(\frac{c_{G,0}}{c_G}\right) = \sum c_i (h_i + h_G)$$
 Eq. 4

330  
 331 In this formulation,  $c_{G,0}$  and  $c_G$  signify the gas concentration in pure water and the salt solution,  
 332 respectively. For each ion in solution,  $c_i$  represents the molar concentration and  $h_G$  and  $h_i$  denote  
 333 gas and ion-specific constants, respectively. The values of these ion-specific parameters are  
 334 provided in Table S9 using the composition of Standard Seawater (55), a temperature- and  
 335 salinity- corrected seawater density equation from Millero & Poisson (56), and  $h_G$  and  $h_i$  values  
 336 from Weisenberger & Schumpe (57). The resulting calculation for methane gas provides the  
 337 dissolved concentration correction factor needed to account for the ionic composition of  
 338 seawater:

339  
 340 
$$c_G = \frac{c_{G,0}}{1.2329}$$
 Eq. 5

341  
 342 Taking temperature and medium composition into account,  $H^{cp}$  for methane in our incubations  
 343 was  $1.7 \times 10^{-5}$  mol / m<sup>3</sup> Pa. This value was used according to equation 2 to determine the  
 344 dissolved concentration of methane in all experiments.

#### 345 Developing a Framework for Assessing Methanotrophic Rates

346  
 347 In order to identify factors that could account for different metabolic rates among samples, a  
 348 conceptual framework was developed. We anticipate that this framework will identify relevant  
 349 variables for future investigation when thorough analysis is beyond the scope of this study.

350 AOM metabolic modeling efforts have sought to explain methane oxidizing rates ( $R_{AOM}$ )  
 351 based on environmental parameters; the most robust combine kinetic and thermodynamic terms,  
 352 as in equation 6 (58).

353  
 354 
$$R_{AOM} = V_{max} F_K F_T$$
 Eq. 6

355  
 356 In this formulation,  $V_{max}$  represents the maximum rate of the reaction, when all available (rate-  
 357 limiting) enzymes are saturated with substrate. This maximal rate is tempered by both kinetic  
 358 ( $F_K$ ) and thermodynamic ( $F_T$ ) factors, which are shown in equations 7 and 8, respectively.

359  
 360 
$$F_K = \left(\frac{[CH_4]}{K_M^{methane} + [CH_4]}\right) \left(\frac{[SO_4^{2-}]}{K_M^{sulfate} + [SO_4^{2-}]}\right)$$
 Eq. 7

361

362

$$F_T = \frac{1}{\exp\left(\frac{\Delta G_r + F\Delta\Psi}{RT}\right) + 1} \quad \text{Eq. 8}$$

363

364 In the kinetic term,  $[CH_4]$  and  $[SO_4^{2-}]$  indicate the concentrations of methane and sulfate,  
 365 respectively, and  $K_M$  values signify Michaelis-Menten constants, or the substrate concentration at  
 366 which the reaction rate is  $V_{max} / 2$ . In the thermodynamic term, which accounts for slower  
 367 reaction rates near equilibrium using Fermi-Dirac statistics (59),  $\Delta G_r$  represents the Gibbs energy  
 368 of the AOM reaction,  $\Delta\Psi$  indicates the potential across the cell membrane,  $F$  stands for the  
 369 Faraday constant,  $R$  the gas constant, and  $T$  the temperature (K).

370 The Gibbs energy quantifies the overall amount of energy required by or liberated from a  
 371 given reaction. Large absolute values reveal that reactants and products are far from equilibrium  
 372 while the sign indicates whether the reaction is endergonic ( $+\Delta G_r$ ) or exergonic ( $-\Delta G_r$ ). Gibbs  
 373 energies are calculated as shown in equation 9,

374

375

$$\Delta G_r = RT \ln\left(\frac{Q}{K}\right) \quad \text{Eq. 9}$$

376

377 in which  $K$  denotes the equilibrium constant and  $Q$ , determined by equation 10, represents the  
 378 reaction quotient.

379

380

$$Q = \prod_i a_i^{V_i} \quad \text{Eq. 10}$$

381

382 Here,  $a_i$  indicates the activity of the  $i$ th species and  $V_i$  signifies the stoichiometric coefficient of  
 383 the  $i$ th species. For AOM,  $Q$  is calculated as

384

385

$$Q = \frac{a_{bicarbonate} a_{sulfide} a_{water}}{a_{methane} a_{sulfate}} \quad \text{Eq. 11}$$

386

387 where activity values are determined by the product of molalities ( $m$ ) and activity coefficients  
 388 ( $\gamma$ ):

389

390

$$a_i = m_i \gamma_i \quad \text{Eq. 12}$$

391

392 Equations 6-12 can be used as the theoretical basis of comparison between samples,  
 393 exposing several parameters as potential differentiators. The variables whose increase would  
 394 enhance  $R_{AOM}$  are  $V_{max}$ ,  $[CH_4]$ ,  $[SO_4^{2-}]$ ,  $T$ ,  $a_{methane}$ , and  $a_{sulfate}$ ; those inversely related to  $R_{AOM}$  are  
 395 methane and sulfate's  $K_M$  values,  $\Delta\Psi$ ,  $a_{bicarbonate}$ ,  $a_{sulfide}$ , and  $a_{water}$ . Activity values are a function  
 396 of molal concentration and activity coefficients, which in turn depend on the solution's  
 397 temperature and ionic strength as determined by an extended version of the Debye-Huckel  
 398 equation (60). Across all initial rate incubation experiments, temperature and pressure were  
 399 consistent and thus not relevant as differentiating variables. Advective transport is an additional,  
 400 frequently dominant, aspect of rate-determining reaction transport models (58, 61), but is not  
 401 included in this analysis because of the batch nature of the incubations.

402 The bulk values of abiotic factors [ $CH_4$ ], [ $SO_4^{2-}$ ],  $a_{methane}$ ,  $a_{sulfate}$ ,  $a_{bicarbonate}$ ,  $a_{sulfide}$ , and  $a_{water}$   
403 were ostensibly consistent between treatments, but the physicochemical context of an organism's  
404 immediate surroundings on the microscale could vary based on the composition of the substrate.  
405 For example, organic carbon content exhibits a positive correlation with methane adsorption to  
406 shale rock surfaces – potentially due to hydrophobic interactions (62, 63) – an effect that is  
407 enhanced with increased porosity (64).

408 Kinetically relevant biotic parameters include  $V_{max}$  and  $K_M$ , as well as additional factors not  
409 explicitly included in equations 6-12.  $V_{max}$  and  $K_M$  values for carbonate rock sample PD R3 and  
410 sediment sample PD PC2 were investigated by measuring methane oxidation rates across a range  
411 of methane concentrations (Fig. S6).  $K_M$  is formally defined as the ratio of the rate of dissociation  
412 of an enzyme-substrate complex (through forward or backward reactions) to its rate of formation,  
413 and is thus most directly relevant to enzyme kinetics on a single cell or single molecule scale  
414 (65). Estimating and interpreting  $K_M$  values from the kinetic data is a challenge in the context of  
415 complex microbial communities, as multiple  $K_M$ s can co-exist. Indeed, the PD R3 data in Fig. S6  
416 could point to a multi-modal system in which kinetics at low methane concentrations (<~45 mM)  
417 are consistent with sediment-based communities, but at higher concentrations, heightened  
418 methane oxidation rates are possible.

419 Given the likely role of direct electron transfer in enabling sulfate-coupled AOM (66, 67),  
420 cell adherence to conductive solid substrates could facilitate the rapid exchange of reducing  
421 equivalents, thereby increasing  $V_{max}$ . While the rate of this potential electron delivery mechanism  
422 through carbonate rocks – several of which contain appreciable quantities of iron-bearing pyrite  
423 (Table S2) – remains uncertain, the ability to maintain syntrophic partners across multiple cell  
424 lengths could overcome temporal and spatial interruptions in reactant supply. An apparent  
425 segregation of ANME and SRB was recently reported on electrically conductive carbon cloth  
426 (68), and some monospecific aggregations were observed along rock pore spaces of the pyrite-  
427 rich PD R1 (Figs. 3, S7), suggesting that direct contact with the rock's surface may sustain  
428 methane-oxidizing and sulfate-reducing metabolism.

429 The influence of particular interspecies interactions on AOM rates – either indirectly  
430 through reactant supply or product drawdown or directly through as-yet-uncharacterized  
431 hydrocarbon metabolic pathways – remains an intriguing prospect. In this context, our data  
432 signify a useful starting point for testing the roles of specific lineages.

433

## 434 **References**

435

- 436 1. A. Salvador, Origin and development of the Gulf of Mexico basin. *The gulf of Mexico basin*,  
437 389–444 (1991).
- 438 2. W. T. Wood, P. E. Hart, D. R. Hutchinson, N. Dutta, F. Snyder, R. B. Coffin, J. F. Gettrust,  
439 Gas and gas hydrate distribution around seafloor seeps in Mississippi Canyon, Northern Gulf  
440 of Mexico, using multi-resolution seismic imagery. *Marine and Petroleum Geology*. **25**,  
441 952–959 (2008).
- 442 3. K. G. Lloyd, D. B. Albert, J. F. Biddle, J. P. Chanton, O. Pizarro, A. Teske, Spatial structure  
443 and activity of sedimentary microbial communities underlying a *Beggiatoa* spp. mat in a  
444 Gulf of Mexico hydrocarbon seep. *PLoS One*. **5**, e8738 (2010).

- 445 4. R. Coffin, L. Hamdan, R. Plummer, J. Smith, J. Gardner, R. Hagen, W. Wood, Analysis of  
446 methane and sulfate flux in methane-charged sediments from the Mississippi Canyon, Gulf  
447 of Mexico. *Marine and Petroleum Geology*. **25**, 977–987 (2008).
- 448 5. M. O. Withjack, R. W. Schlische, (SEPM, 2005), pp. 203–235.
- 449 6. J. Obelcz, D. Brothers, J. Chaytor, U. ten Brink, S. W. Ross, S. Brooke, Geomorphic  
450 characterization of four shelf-sourced submarine canyons along the US Mid-Atlantic  
451 continental margin. *Deep Sea Research Part II: Topical Studies in Oceanography*. **104**, 106–  
452 119 (2014).
- 453 7. A. Skarke, C. Ruppel, M. Kodis, D. Brothers, E. Lobecker, Widespread methane leakage  
454 from the sea floor on the northern US Atlantic margin. *Nature Geoscience*. **7**, 657–661  
455 (2014).
- 456 8. A. M. Quattrini, M. S. Nizinski, J. D. Chaytor, A. W. Demopoulos, E. B. Roark, S. C.  
457 France, J. A. Moore, T. Heyl, P. J. Auster, B. Kinlan, Exploration of the canyon-incised  
458 continental margin of the northeastern United States reveals dynamic habitats and diverse  
459 communities. *PloS one*. **10**, e0139904 (2015).
- 460 9. D. McVeigh, A. Skarke, A. Dekas, C. Borrelli, W.-L. Hong, J. Marlow, A. Pasulka, S.  
461 Jungbluth, R. Barco, A. Djurhuus, Characterization of benthic biogeochemistry and ecology  
462 at three methane seep sites on the northern US Atlantic margin. *Deep Sea Research Part II:  
463 Topical Studies in Oceanography* (2018).
- 464 10. J. K. Whelan, B. R. Simoneit, M. E. Tarafa, C1C8 hydrocarbons in sediments from Guaymas  
465 Basin, Gulf of California—Comparison to Peru Margin, Japan Trench and California  
466 Borderlands. *Organic geochemistry*. **12**, 171–194 (1988).
- 467 11. K. von Von Damm, J. t Edmond, C. Measures, B. Grant, Chemistry of submarine  
468 hydrothermal solutions at Guaymas Basin, Gulf of California. *Geochimica et Cosmochimica  
469 Acta*. **49**, 2221–2237 (1985).
- 470 12. C. S. Martens, Generation of short chain acid anions in hydrothermally altered sediments of  
471 the Guaymas Basin, Gulf of California. *Applied Geochemistry*. **5**, 71–76 (1990).
- 472 13. F. Dowell, Z. Cardman, S. Dasarathy, M. Y. Kellermann, J. S. Lipp, S. E. Ruff, J. F. Biddle,  
473 L. J. McKay, B. J. MacGregor, K. G. Lloyd, Microbial communities in methane-and short  
474 chain alkane-rich hydrothermal sediments of Guaymas Basin. *Frontiers in microbiology*. **7**  
475 (2016).
- 476 14. J. Kallmeyer, A. Boetius, Effects of Temperature and Pressure on Sulfate Reduction and  
477 Anaerobic Oxidation of Methane in Hydrothermal Sediments of Guaymas Basin. *Applied  
478 and Environmental Microbiology*. **70**, 1231–1233 (2004).
- 479 15. M. Y. Kellermann, G. Wegener, M. Elvert, M. Y. Yoshinaga, Y.-S. Lin, T. Holler, X. P.  
480 Mollar, K. Knittel, K.-U. Hinrichs, Autotrophy as a predominant mode of carbon fixation in

- 481 anaerobic methane-oxidizing microbial communities. *Proceedings of the National Academy*  
482 *of Sciences*. **109**, 19321–19326 (2012).
- 483 16. J. F. Biddle, Z. Cardman, H. Mendlovitz, D. B. Albert, K. G. Lloyd, A. Boetius, A. Teske,  
484 Anaerobic oxidation of methane at different temperature regimes in Guaymas Basin  
485 hydrothermal sediments. *ISME J.* **6**, 1018–1031 (2012).
- 486 17. T. Holler, F. Widdel, K. Knittel, R. Amann, M. Y. Kellermann, K.-U. Hinrichs, A. Teske, A.  
487 Boetius, G. Wegener, Thermophilic anaerobic oxidation of methane by marine microbial  
488 consortia. *ISME J.* **5**, 1946–1956 (2011).
- 489 18. J. Vedder, Regional geology and petroleum potential of the southern California borderland  
490 (1987).
- 491 19. D. G. Moore, Reflection profiling studies of the California continental borderland: structure  
492 and Quaternary turbidite basins. *Geological Society of America Special Papers*. **107**, 1–136  
493 (1969).
- 494 20. P. Eichhubl, H. G. Greene, N. Maher, Physiography of an active transpressive margin basin:  
495 high-resolution bathymetry of the Santa Barbara basin, Southern California continental  
496 borderland. *Marine Geology*. **184**, 95–120 (2002).
- 497 21. J. S. Hornafius, D. Quigley, B. P. Luyendyk, The world's most spectacular marine  
498 hydrocarbon seeps (Coal Oil Point, Santa Barbara Channel, California): Quantification of  
499 emissions. *Journal of Geophysical Research: Oceans*. **104**, 20703–20711 (1999).
- 500 22. C. K. Paull, W. R. Normark, W. Ussler III, D. W. Caress, R. Keaten, Association among  
501 active seafloor deformation, mound formation, and gas hydrate growth and accumulation  
502 within the seafloor of the Santa Monica Basin, offshore California. *Marine Geology*. **250**,  
503 258–275 (2008).
- 504 23. K. L. C. Bell, M. L. Brennan, J. Flanders, N. A. Raineault, K. Wagner, *New Frontiers in*  
505 *Ocean Exploration: The E/V Nautilus and NOAA Ship Okeanos Explorer, 2015 Field Season*  
506 (Oceanography Society, 2016).
- 507 24. D. G. Moore, Acoustic-reflection studies of the continental shelf and slope off southern  
508 California. *Geological Society of America Bulletin*. **71**, 1121–1136 (1960).
- 509 25. M. A. Hampton, H. A. Karl, C. J. Murray, Acoustic profiles and images of the Palos Verdes  
510 margin: implications concerning deposition from the White's Point outfall. *Continental Shelf*  
511 *Research*. **22**, 841–857 (2002).
- 512 26. L. Levin, P. R. Girguis, C. R. German, M. L. Brennan, S. Tuzun, J. Wagner, C. Smart, A.  
513 Kruger, K. Inderbitzen, J. Le, Exploration and discovery of methane seeps and associated  
514 communities in the California Borderland. *Oceanography*, 40–43 (2016).

- 515 27. D. H. Case, A. L. Pasulka, J. J. Marlow, B. M. Grupe, L. A. Levin, V. J. Orphan, Methane  
516 seep carbonates host distinct, diverse, and dynamic microbial assemblages. *MBio*. **6**, e01348-  
517 15 (2015).
- 518 28. Treude, Boetius, Knittel, Wallmann, Jorgensen, Anaerobic oxidation of methane above gas  
519 hydrates at Hydrate Ridge, NE Pacific Ocean. *Mar Ecol Prog Ser*. **264**, 1–14 (2003).
- 520 29. R. J. Meulepas, C. G. Jagersma, Y. Zhang, M. Petrillo, H. Cai, C. J. Buisman, A. J. Stams, P.  
521 N. Lens, Trace methane oxidation and the methane dependency of sulfate reduction in  
522 anaerobic granular sludge. *FEMS microbiology ecology*. **72**, 261–271 (2010).
- 523 30. J. Marlow, A. Kumar, B. Enalls, L. Reynard, N. Tuross, G. Stephanopoulos, P. Girguis,  
524 Harnessing a Methane-Fueled, Sediment-Free Mixed Microbial Community for Utilization  
525 of Distributed Sources of Natural Gas. *Biotechnology & Bioengineering*. **115**, 1450-1464  
526 (2018).
- 527 31. R. Sander, Compilation of Henry's law constants (version 4.0) for water as solvent.  
528 *Atmospheric Chemistry & Physics*. **15** (2015).
- 529 32. K. Nauhaus, A. Boetius, M. Krüger, F. Widdel, In vitro demonstration of anaerobic oxidation  
530 of methane coupled to sulphate reduction in sediment from a marine gas hydrate area.  
531 *Environmental Microbiology*. **4**, 296–305 (2002).
- 532 33. Y. Zhang, J.-P. Henriot, J. Bursens, N. Boon, Stimulation of in vitro anaerobic oxidation of  
533 methane rate in a continuous high-pressure bioreactor. *Bioresource Technology*. **101**, 3132–  
534 3138 (2010).
- 535 34. S. Scheller, M. Goenrich, R. Boecher, R. K. Thauer, B. Jaun, The key nickel enzyme of  
536 methanogenesis catalyses the anaerobic oxidation of methane. *Nature*. **465**, 606–608 (2010).
- 537 35. M. Bowles, V. Samarkin, K. Hunter, N. Finke, A. Teske, P. Girguis, S. Joye, Remarkable  
538 capacity for anaerobic oxidation of methane at high methane concentration. *Geophysical*  
539 *Research Letters*. **46**, 12192–12201 (2019).
- 540 36. W. G. Weisburg, S. M. Barns, D. A. Pelletier, D. J. Lane, 16S ribosomal DNA amplification  
541 for phylogenetic study. *Journal of bacteriology*. **173**, 697–703 (1991).
- 542 37. S. T. Bates, D. Berg-Lyons, J. G. Caporaso, W. A. Walters, R. Knight, N. Fierer, Examining  
543 the global distribution of dominant archaeal populations in soil. *The ISME journal*. **5**,  
544 ismej2010171 (2010).
- 545 38. J. Zhang, K. Kobert, T. Flouri, A. Stamatakis, PEAR: a fast and accurate Illumina Paired-  
546 End reAd mergeR. *Bioinformatics*. **30**, 614–620 (2013).
- 547 39. R. C. Edgar, Search and clustering orders of magnitude faster than BLAST. *Bioinformatics*.  
548 **26**, 2460–2461 (2010).

- 549 40. C. Quast, E. Pruesse, P. Yilmaz, J. Gerken, T. Schweer, P. Yarza, J. Peplies, F. O. Glöckner,  
550 The SILVA ribosomal RNA gene database project: improved data processing and web-based  
551 tools. *Nucleic acids research*. **41**, D590–D596 (2013).
- 552 41. J. G. Caporaso, J. Kuczynski, J. Stombaugh, K. Bittinger, F. D. Bushman, E. K. Costello, N.  
553 Fierer, A. G. Pena, J. K. Goodrich, J. I. Gordon, QIIME allows analysis of high-throughput  
554 community sequencing data. *Nature methods*. **7**, 335–336 (2010).
- 555 42. A. Amir, D. McDonald, J. A. Navas-Molina, E. Kopylova, J. T. Morton, Z. Zech Xu, E. P.  
556 Kightley, L. R. Thompson, E. R. Hyde, A. Gonzalez, R. Knight, Deblur Rapidly Resolves  
557 Single-Nucleotide Community Sequence Patterns. *mSystems*. **2** (2017),  
558 doi:10.1128/mSystems.00191-16.
- 559 43. T. Rognes, T. Flouri, B. Nichols, C. Quince, F. Mahé, VSEARCH: a versatile open source  
560 tool for metagenomics. *PeerJ*. **4**, e2584 (2016).
- 561 44. E. Kopylova, L. Noé, H. Touzet, SortMeRNA: fast and accurate filtering of ribosomal RNAs  
562 in metatranscriptomic data. *Bioinformatics*. **28**, 3211–3217 (2012).
- 563 45. K. Katoh, K. Misawa, K. Kuma, T. Miyata, MAFFT: a novel method for rapid multiple  
564 sequence alignment based on fast Fourier transform. *Nucleic acids research*. **30**, 3059–3066  
565 (2002).
- 566 46. B. J. Callahan, P. J. McMurdie, M. J. Rosen, A. W. Han, A. J. A. Johnson, S. P. Holmes,  
567 DADA2: high-resolution sample inference from Illumina amplicon data. *Nature methods*.  
568 **13**, 581–583 (2016).
- 569 47. R. C. Edgar, MUSCLE: multiple sequence alignment with high accuracy and high  
570 throughput. *Nucleic acids research*. **32**, 1792–1797 (2004).
- 571 48. M. N. Price, P. S. Dehal, A. P. Arkin, FastTree 2—approximately maximum-likelihood trees  
572 for large alignments. *PloS one*. **5**, e9490 (2010).
- 573 49. C. Camacho, G. Coulouris, V. Avagyan, N. Ma, J. Papadopoulos, K. Bealer, T. L. Madden,  
574 BLAST+: architecture and applications. *BMC bioinformatics*. **10**, 421 (2009).
- 575 50. E. Pruesse, J. Peplies, F. O. Glöckner, SINA: accurate high-throughput multiple sequence  
576 alignment of ribosomal RNA genes. *Bioinformatics*. **28**, 1823–1829 (2012).
- 577 51. W. Ludwig, O. Strunk, R. Westram, L. Richter, H. Meier, Yadhukumar, A. Buchner, T. Lai,  
578 S. Steppi, G. Jobb, W. Förster, I. Brettske, S. Gerber, A. W. Ginhart, O. Gross, S. Grumann,  
579 S. Hermann, R. Jost, A. König, T. Liss, R. Lüßmann, M. May, B. Nonhoff, B. Reichel, R.  
580 Strehlow, A. Stamatakis, N. Stuckmann, A. Vilbig, M. Lenke, T. Ludwig, A. Bode, K.  
581 Schleifer, ARB: a software environment for sequence data. *Nucleic Acids Research*. **32**,  
582 1363–1371 (2004).
- 583 52. A. Stamatakis, RAxML-VI-HPC: maximum likelihood-based phylogenetic analyses with  
584 thousands of taxa and mixed models. *Bioinformatics*. **22**, 2688–2690 (2006).

- 585 53. R. C. Team, R: A language and environment for statistical computing. Vienna, Austria: R  
586 Foundation for Statistical Computing; 2014 (2014).
- 587 54. A. Schumpe, The estimation of gas solubilities in salt solutions. *Chemical Engineering*  
588 *Science*. **48**, 153–158 (1993).
- 589 55. F. J. Millero, R. Feistel, D. G. Wright, T. J. McDougall, The composition of Standard  
590 Seawater and the definition of the Reference-Composition Salinity Scale. *Deep Sea Research*  
591 *Part I: Oceanographic Research Papers*. **55**, 50–72 (2008).
- 592 56. F. J. Millero, A. Poisson, International one-atmosphere equation of state of seawater. *Deep*  
593 *Sea Research Part A. Oceanographic Research Papers*. **28**, 625–629 (1981).
- 594 57. S. Weisenberger, A. Schumpe, Estimation of gas solubilities in salt solutions at temperatures  
595 from 273 K to 363 K. *AIChE J.* **42**, 298–300 (1996).
- 596 58. P. Regnier, A. W. Dale, S. Arndt, D. E. LaRowe, J. Mogollón, P. Van Cappellen,  
597 Quantitative analysis of anaerobic oxidation of methane (AOM) in marine sediments: A  
598 modeling perspective. *Earth-Science Reviews*. **106**, 105–130 (2011).
- 599 59. D. E. LaRowe, A. W. Dale, J. P. Amend, P. Van Cappellen, Thermodynamic limitations on  
600 microbially catalyzed reaction rates. *Geochimica et Cosmochimica Acta*. **90**, 96–109 (2012).
- 601 60. H. C. Helgeson, Thermodynamics of hydrothermal systems at elevated temperatures and  
602 pressures. *American Journal of Science*. **267**, 729–804 (1969).
- 603 61. J. J. Marlow, D. E. LaRowe, B. L. Ehlmann, J. P. Amend, V. J. Orphan, The potential for  
604 biologically catalyzed anaerobic methane oxidation on ancient Mars. *Astrobiology*. **14**, 292–  
605 307 (2014).
- 606 62. T. Zhang, G. S. Ellis, S. C. Ruppel, K. Milliken, R. Yang, Effect of organic-matter type and  
607 thermal maturity on methane adsorption in shale-gas systems. *Organic geochemistry*. **47**,  
608 120–131 (2012).
- 609 63. D. J. Ross, R. M. Bustin, The importance of shale composition and pore structure upon gas  
610 storage potential of shale gas reservoirs. *Marine and Petroleum Geology*. **26**, 916–927  
611 (2009).
- 612 64. J. Xiong, X. Liu, L. Liang, Q. Zeng, Methane adsorption on carbon models of the organic  
613 matter of organic-rich shales. *Energy & Fuels*. **31**, 1489–1501 (2017).
- 614 65. B. P. English, W. Min, A. M. Van Oijen, K. T. Lee, G. Luo, H. Sun, B. J. Cherayil, S. Kou,  
615 X. S. Xie, Ever-fluctuating single enzyme molecules: Michaelis-Menten equation revisited.  
616 *Nature chemical biology*. **2**, 87–94 (2006).
- 617 66. S. E. McGlynn, G. L. Chadwick, C. P. Kempes, V. J. Orphan, Single cell activity reveals  
618 direct electron transfer in methanotrophic consortia. *Nature*. **526**, 531–535 (2015).



- 619 67. G. Wegener, V. Krukenberg, D. Riedel, H. E. Tegetmeyer, A. Boetius, Intercellular wiring  
620 enables electron transfer between methanotrophic archaea and bacteria. *Nature*. **526**, 587–  
621 590 (2015).
- 622 68. J. J. Marlow, A. Kumar, B. Enalls, L. M. Reynard, N. Tuross, G. Stephanopoulos, P. Girguis,  
623 Harnessing a Methane-Fueled, Sediment-Free Mixed Microbial Community for Utilization  
624 of Distributed Sources of Natural Gas. *Biotechnology and bioengineering* (2018).

625  
626 **Supplemental Figure Captions**  
627

628 Fig. S1: Geographic setting and site context of the Gulf of Mexico samples used in this  
629 study. Maximum depths of the bathymetric maps are 3902m (upper left) and 2552m (upper  
630 right). A) The carbonate mound from which GoM R1 and R2 were collected; mound is  
631 approximately 1.5 m tall, and scale bar is 1 m in length. B) Sample GoM R1 immediately after  
632 collection. C) The collection site for samples GoM R3 and R4. D) Inset of C marked by orange  
633 box; arrow points to outcropping methane hydrate. Scale bars in C and D are 50 cm. E) Sample  
634 GoM R3 immediately after collection.

635  
636 Fig. S2: Geographic setting and site context of the U.S. Atlantic Margin samples used in  
637 this study. Bathymetric maps show the shelf-slope break along this passive margin; maximum  
638 depths are 2818 m (upper left) and 1932 m (upper right). A) and B) show the VC R1 collection  
639 site, which was marked by bivalve shells and white microbial mat characteristic of active seep  
640 sites; scale bars are 1 m and 50 cm, respectively. C) and D) reveal the VC R2 collection site,  
641 devoid of traditional signs of methane seepage; scale bars are 1 m and 50 cm, respectively. E)  
642 shows the NES R1 collection site, on the edge of a white microbial mat (visible in upper left of  
643 image; scale bar 1m). F) and G) depict the native position of sample NES R2, recovered from a  
644 site approximately 50 m from the nearest sign of seepage; scale bars are 1 m and 10 cm,  
645 respectively.

646  
647 Fig. S3: Geographic setting and site context of the Guaymas Basin samples used in this  
648 study. The bathymetric map shows the Guaymas Basin North and South sites situated in the  
649 central Gulf of California. The maximum depth of the region bounded by the map is 2050 m. A)  
650 Collection site of sample GBN R1, a poorly lithified rock associated with abundant worm tubes.  
651 B) The rocky outcrop from which sample GBN R2 was collected had a thin covering of brown  
652 sediment. C) and D) show the push core site within a circular white mat from which sample  
653 GBN R3 was recovered. E) was taken during collection of GBN PC1 within a patch of worm  
654 burrows covered by thin white mat, adjacent to a patch of tube worms. F) GBN PC1 on deck,  
655 immediately after recovery. G) shows the collection of rock sample GBS R1, from Cathedral  
656 Hill. Image A-E scale bars are 1 m; G scale bar is 10 cm.

657  
658 Fig. S4: Geographic setting and site context of the California Coast samples used in this  
659 study. The bathymetric maps show the Point Dume and Palos Verdes sites situated within the  
660 California Borderlands active transpressional margin; maximum depths are 4657 m (upper left  
661 map) and 1915 m (upper right). Samples PD R1, PD R2, and PD R4 were microbial mat-covered  
662 chimney samples. PD R1 and PD R2 are shown in situ (A) and during collection (B, PD R1  
663 only). C) PD R4 is shown prior to incubation set up, in a lab-based anoxic chamber. D-E) PD R3

664 was a shallowly buried piece of overhanging carbonate pavement. At Palos Verdes, PV R1 and  
665 PV R2 were recovered from an area showing no signs of active seepage. PV R1 was buried  
666 carbonate pavement (F), while PV R2 was the top of a chimney-like structure devoid of  
667 microbial mat covering (G, H). Scale bars for images A, D, and F are 50 cm; scale bars for B, C,  
668 E, G, and H are 10 cm.

669  
670 Fig. S5: Views of the Point Dume chimney field. A-E) the arrangements of several  
671 structures along the shallow sloping base of the Dume submarine canyon; all scale bars are  
672 approximately 1 m across at each photo's mid-point plane. F-I) Individual chimney structures  
673 0.25-1m in height; scale bars are approximately 10 cm across at each photo's mid-point plane.  
674

675 Fig. S6: Methane oxidation rates exhibited by sediment (PD PC2 0-5) and rock (PD R3)  
676 samples at varying methane concentrations. All samples were incubated at 7.58 MPa and  
677 measured using the CH<sub>3</sub>D approach.  
678

679 Fig. S7: Scanning electron microscope images of sample PD R1. A) Many putative  
680 framboidal pyrites (marked by white arrows) populate the rock interior. B) An aggregation of  
681 apparent cells (right) is in direct contact with a framboidal pyrite (left). The likely cell  
682 assemblage is very similar in size and shape to electron microscopy images of ANME-SRB  
683 consortia reported in studies such as McGlynn et al., 2018. C) and D) show aragonite fans within  
684 the rock.  
685

686 Fig. S8: Control FISH images of intact interior portions of sample PD R1. Left: potential  
687 non-specific binding was tested by adding the non-Bact338-Cy3 probe. Right: potential  
688 autofluorescence was tested by not adding any fluorescent probes. Top panels show the rock  
689 surfaces; bottom panel overlays fluorescence channels used to visualize the Arch 915 and DSS  
690 658 FISH probes, as in Fig. 3. All FISH protocol steps were followed.  
691

692 Fig. S9: Histogram of number of mismatches between sequences derived from DADA2,  
693 Deblur, and UCLUST protocols and their nearest corresponding NCBI BLAST hit. Deblur was  
694 selected to generate the exact sequence variants reported in this study because it output the  
695 highest proportion of exact matches.  
696

697 Fig. S10: Alpha diversity analyses of the 16S rRNA gene exact sequence variants derived  
698 from each sample's microbial community. Columns correspond to distinct samples grouped by  
699 geological setting; rows correspond to distinct alpha diversity metrics (see Supporting  
700 Information for additional details). Marker colors correspond to AOM rates; heat map key is  
701 shown at right.  
702

703 Fig. S11: Beta diversity non-metric multi-dimensional scaling analyses using the 16S  
704 rRNA gene exact sequence variants and their relative abundances for all sequenced samples.  
705 Samples whose markers plot close to each other host relatively similar communities; more  
706 distant symbols indicate less similar communities. Each plot shows a distinct beta diversity  
707 metric (see Supporting Information for additional details). Symbol size corresponds to AOM  
708 rate, and symbol color indicates sample location.

Figure S1

# Gulf of Mexico Sites

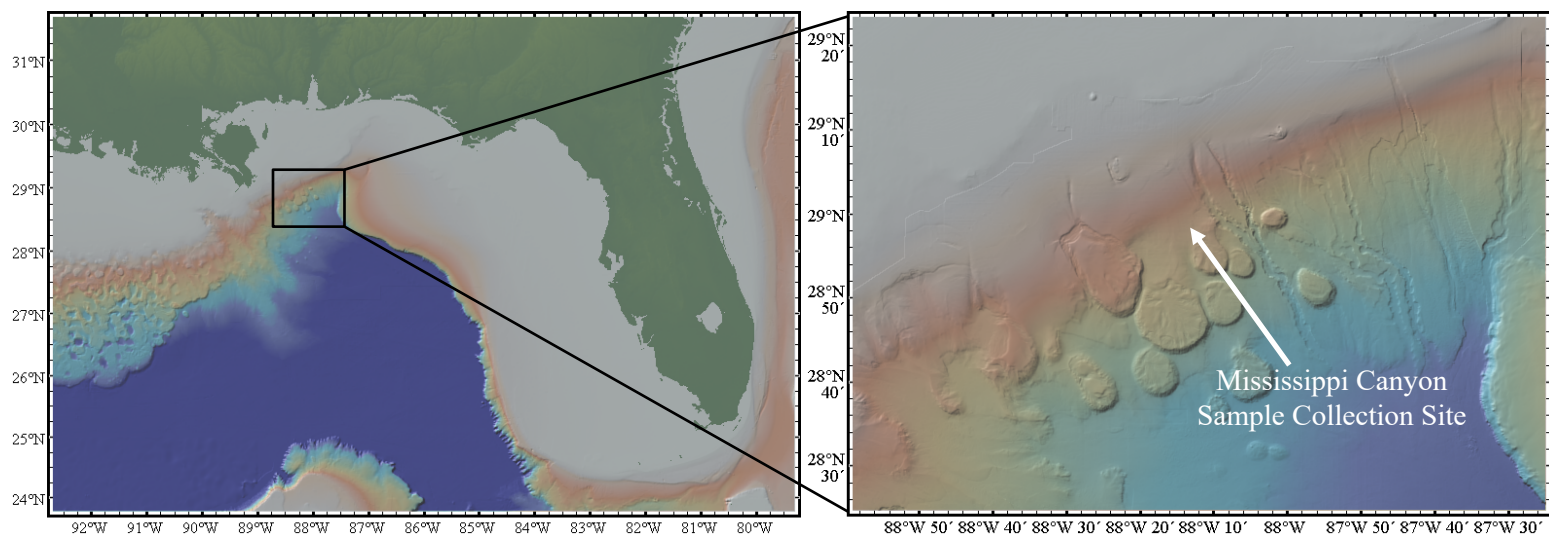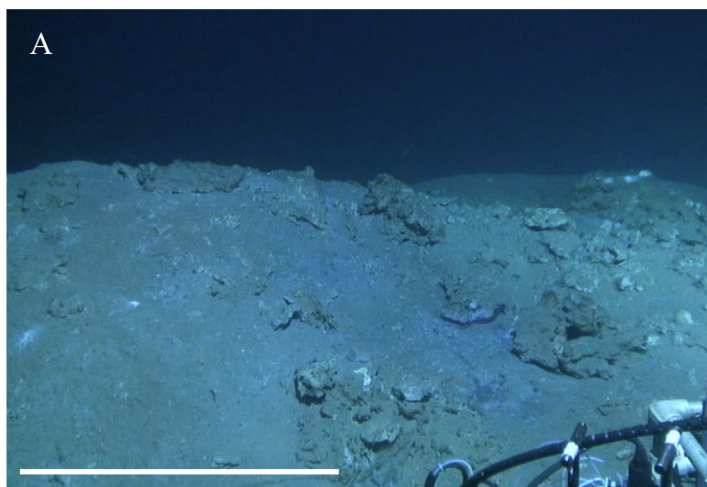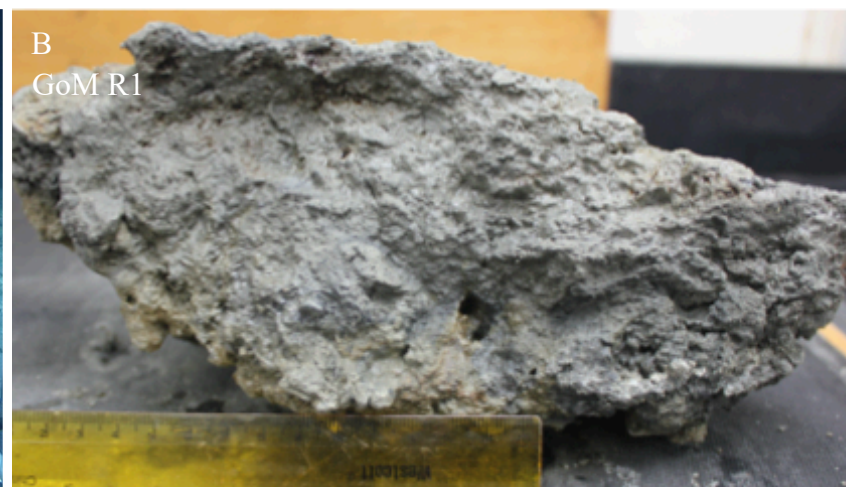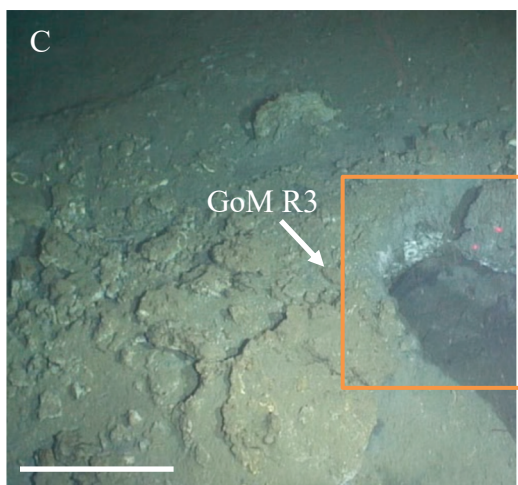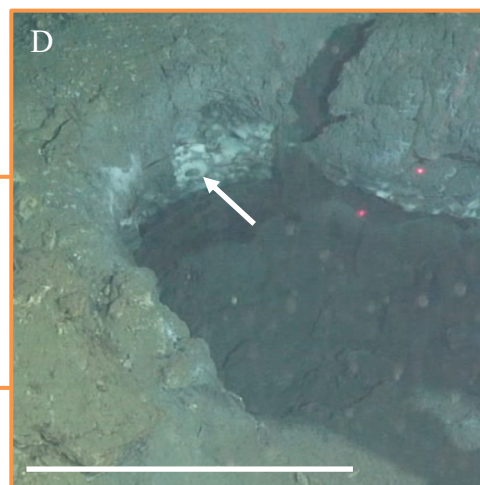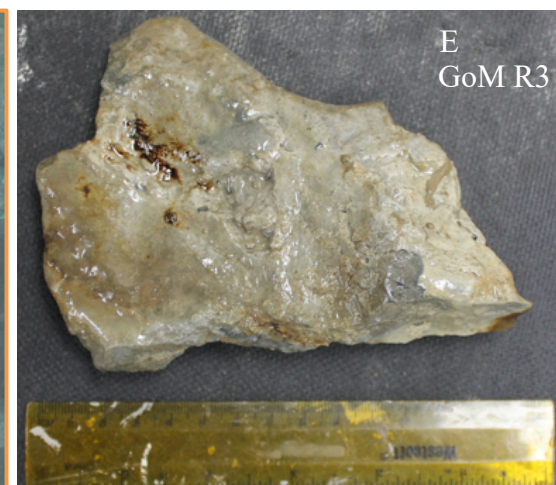

Figure S2

# U.S. Atlantic Margin Sites

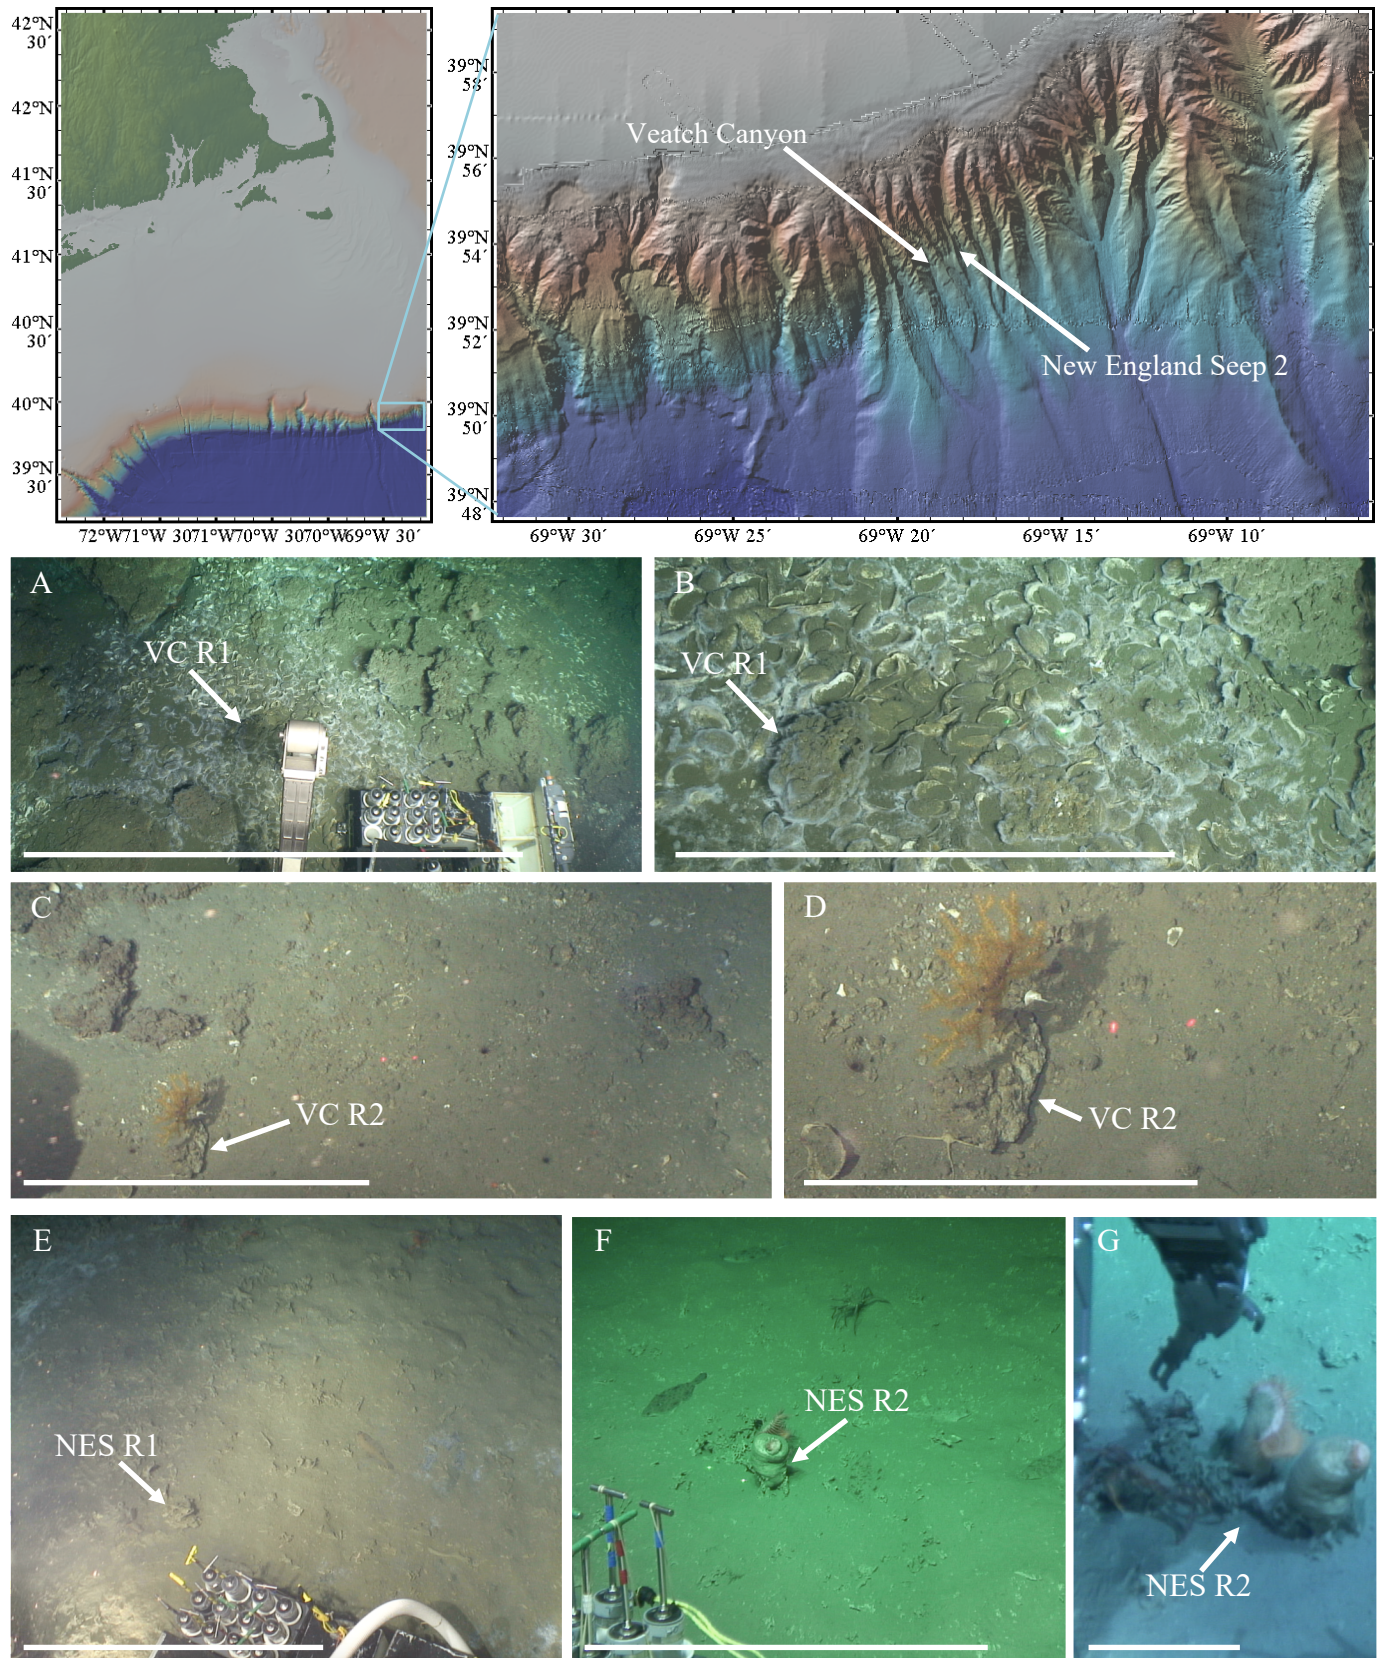

Figure S3

# Guaymas Basin

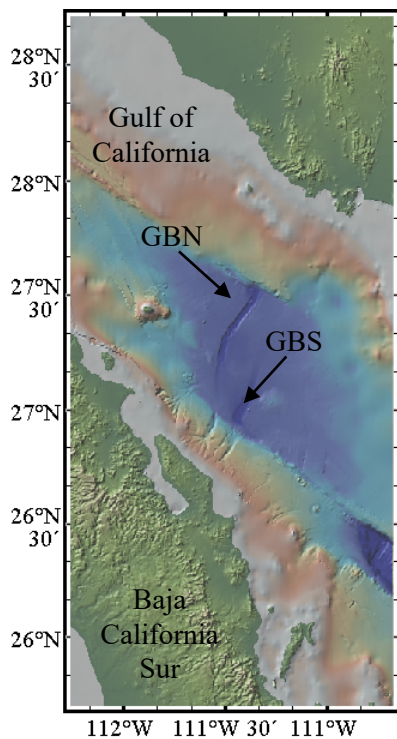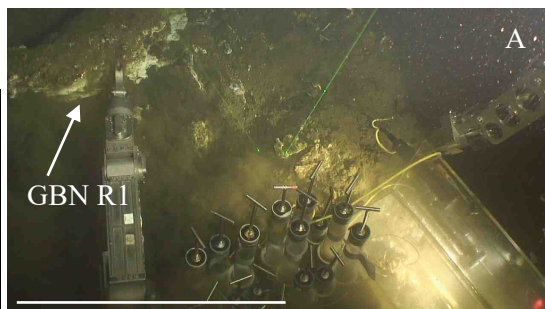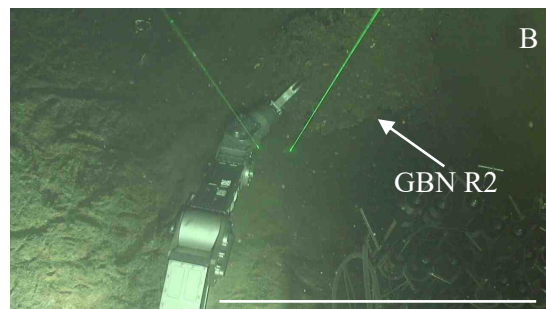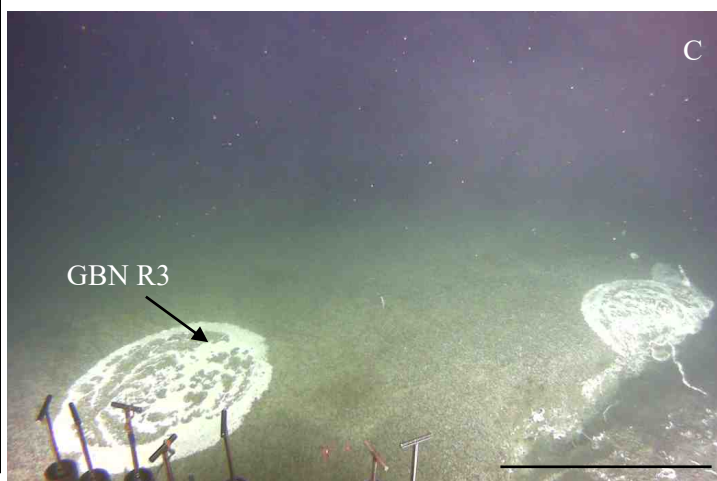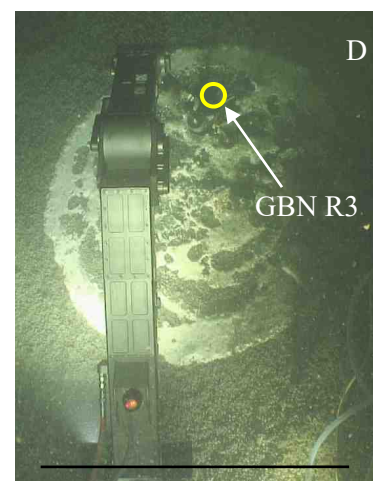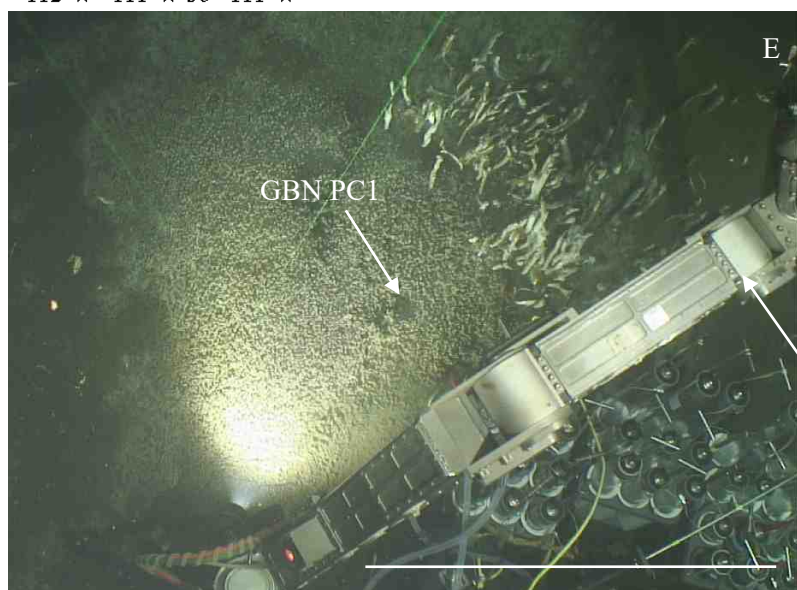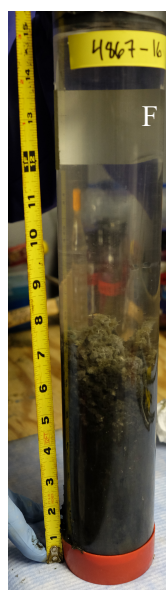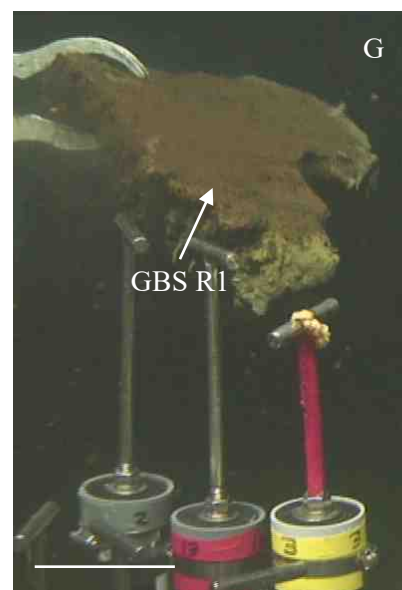

Figure S4

# California Coast Sites

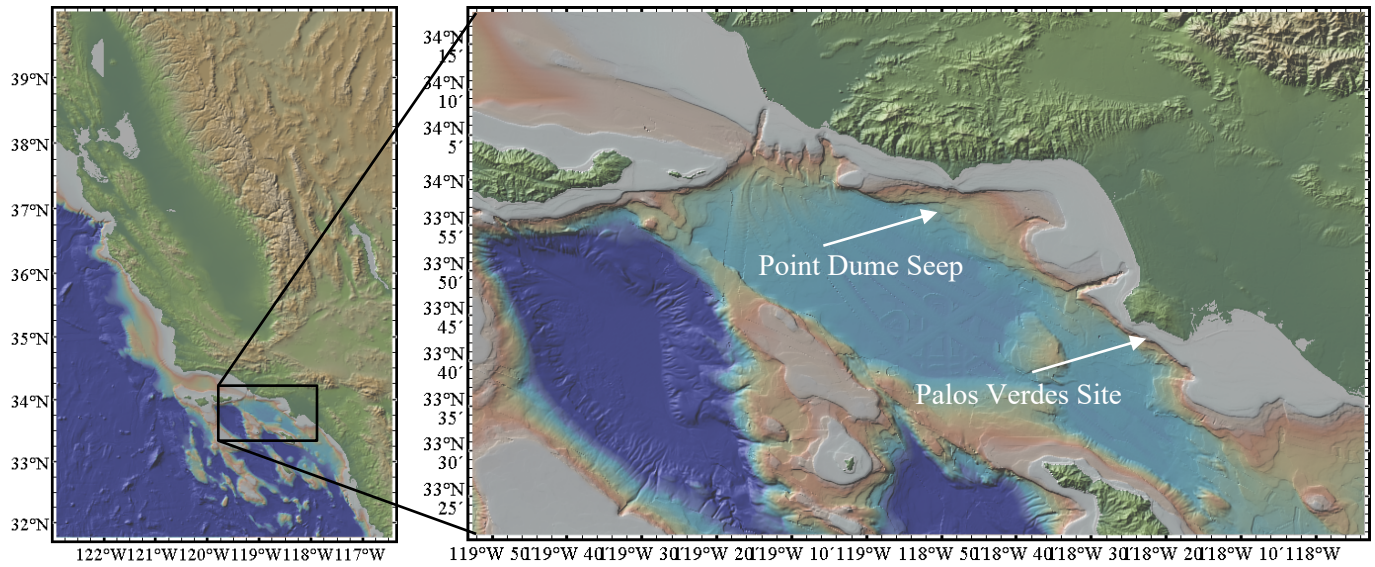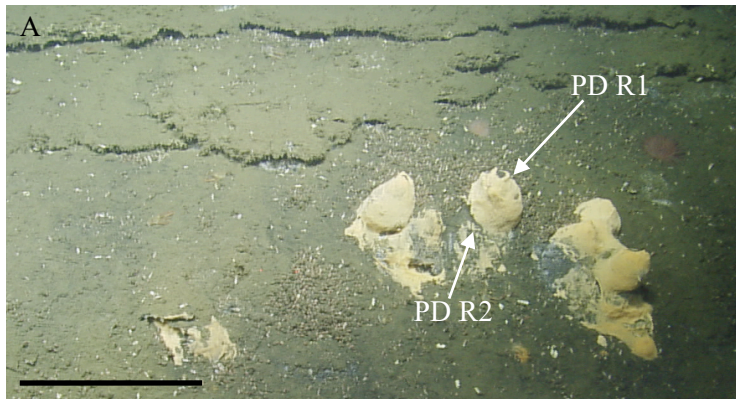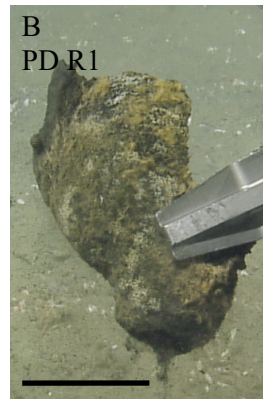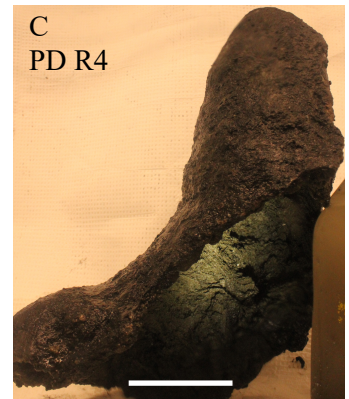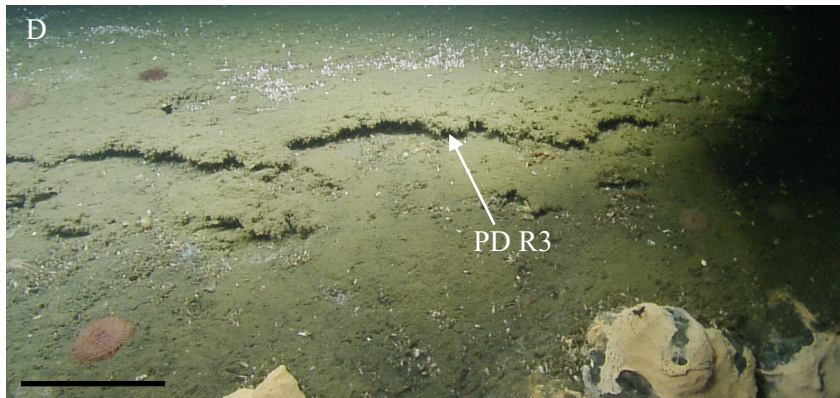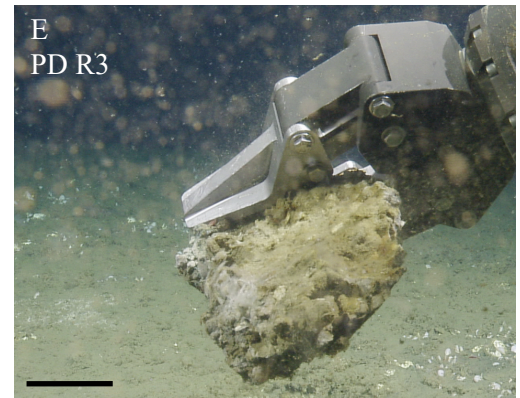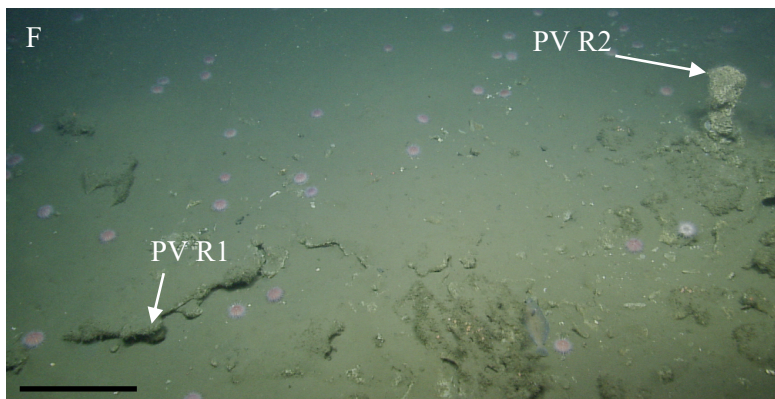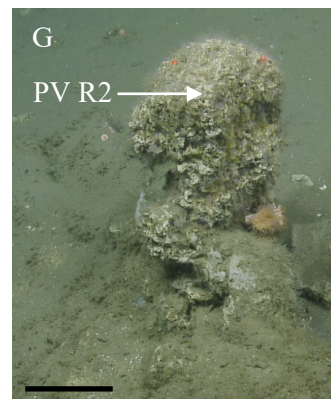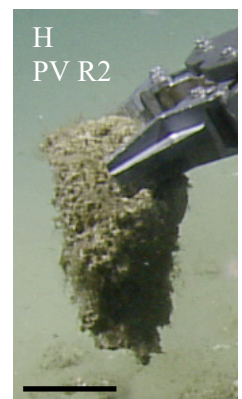

Figure S5

# Point Dume Seep

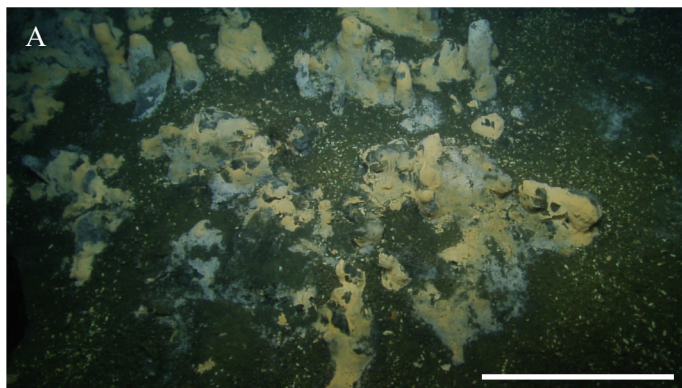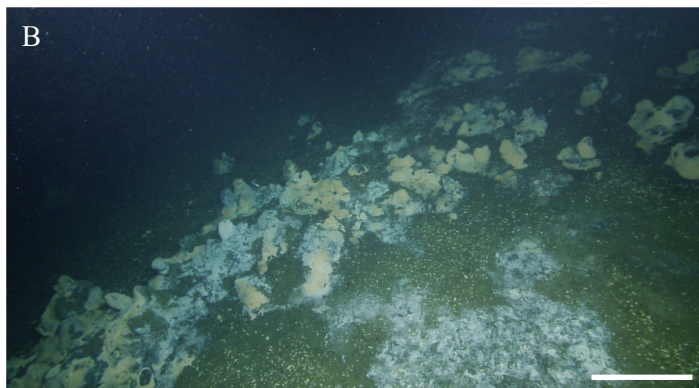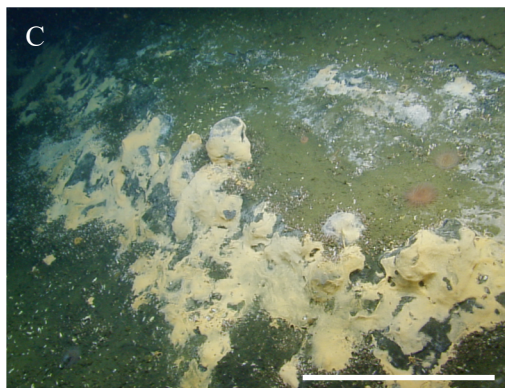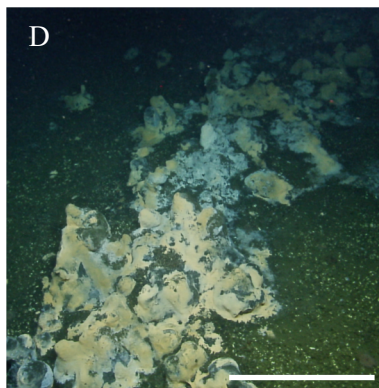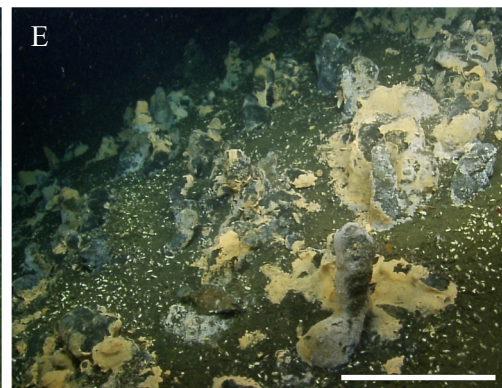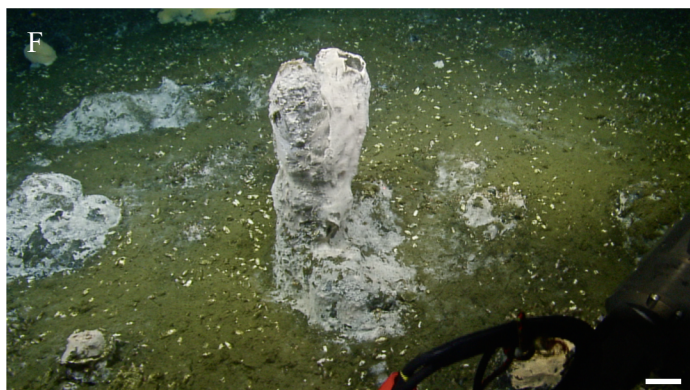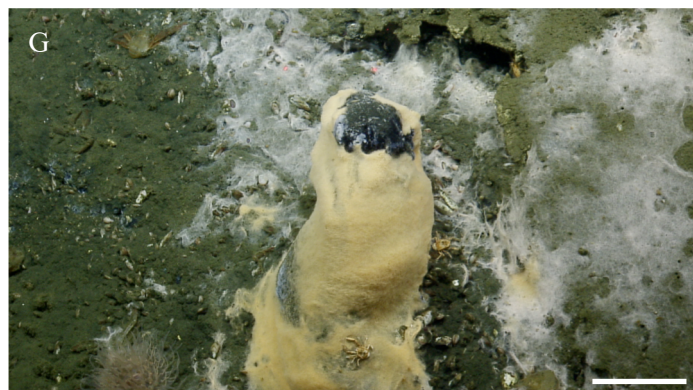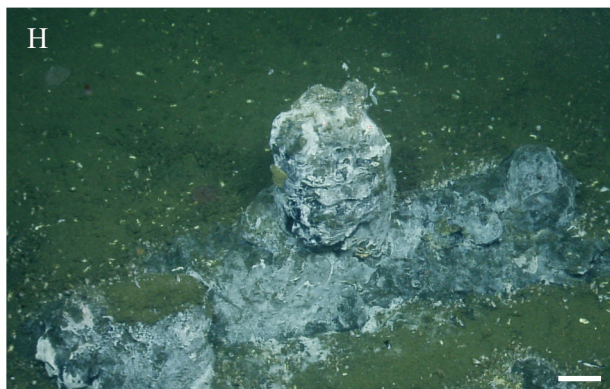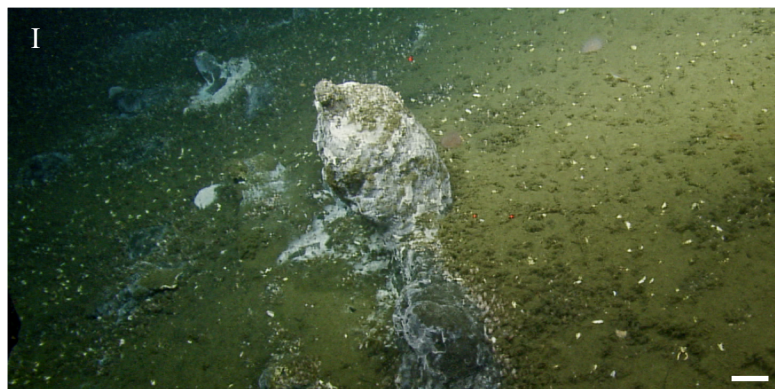

Figure S6

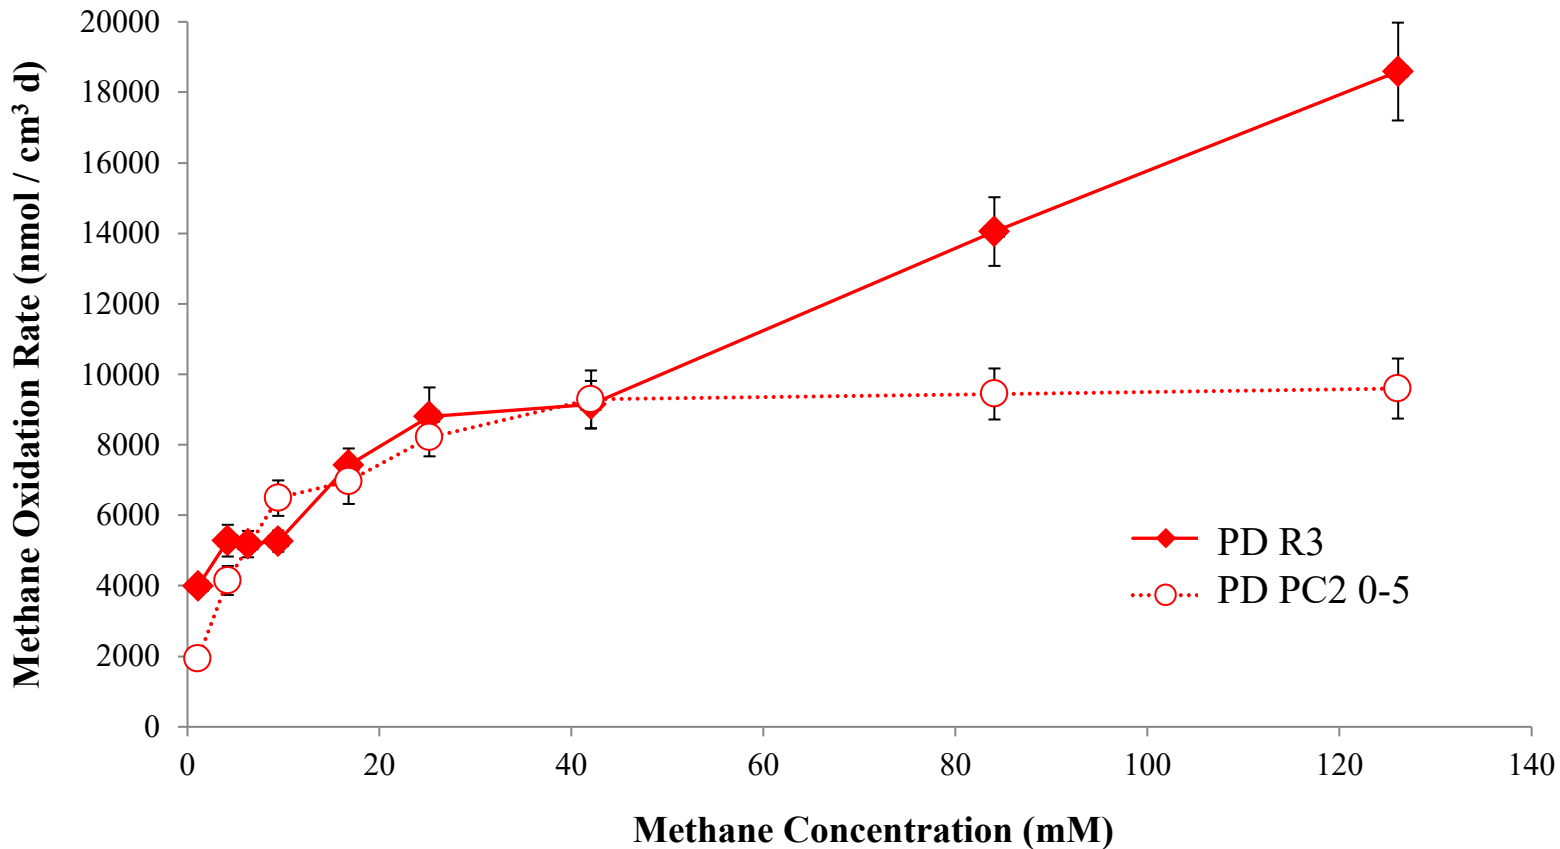



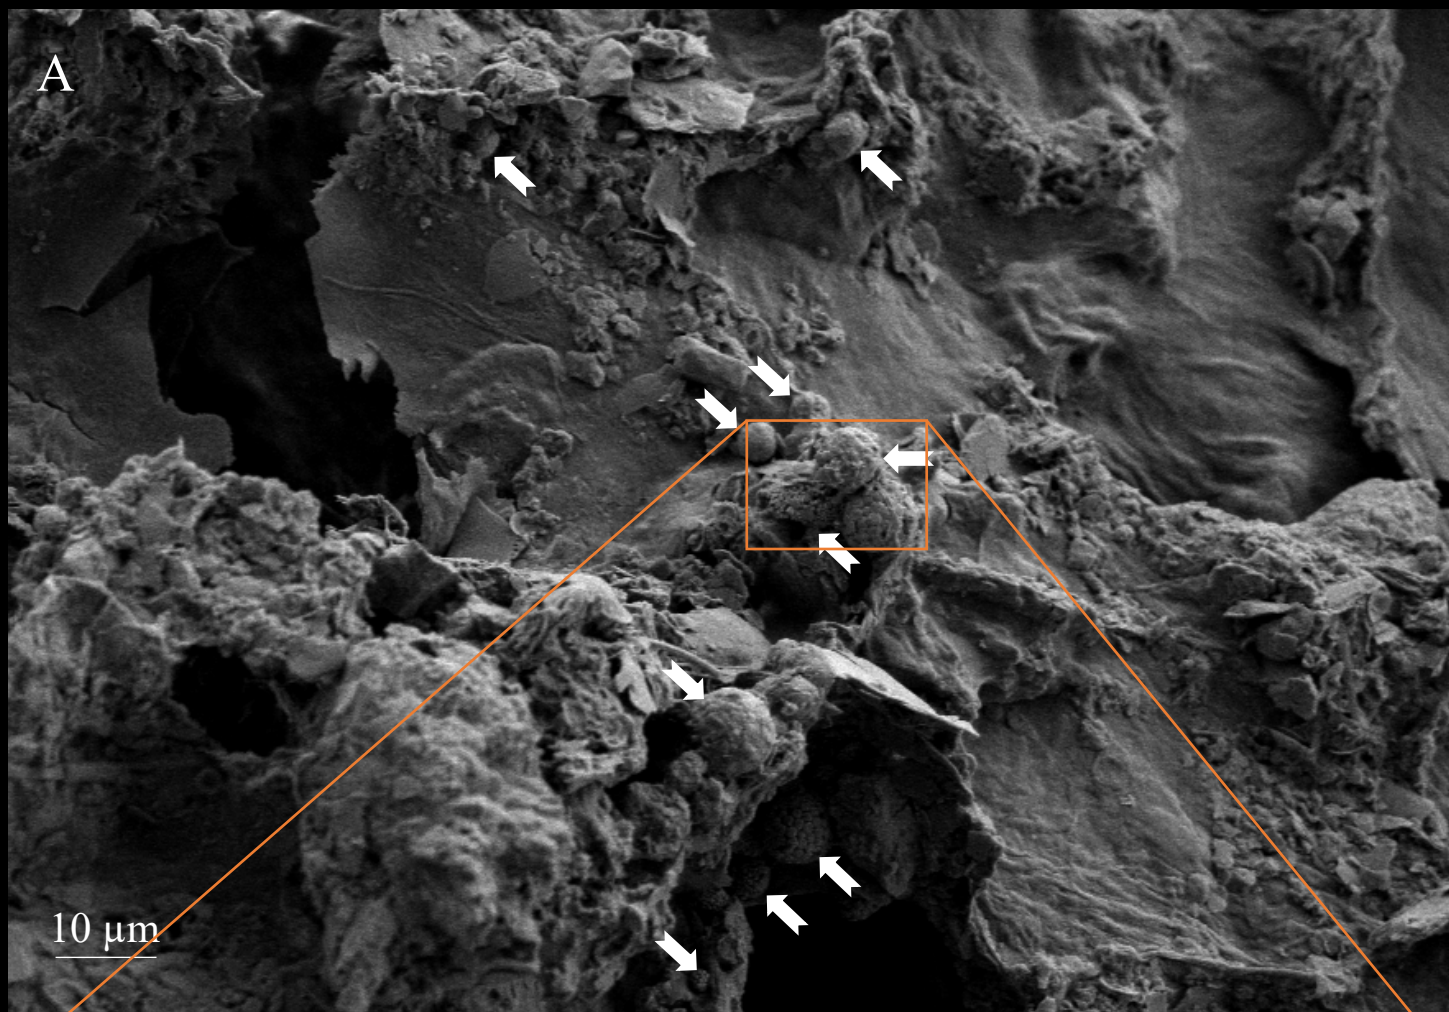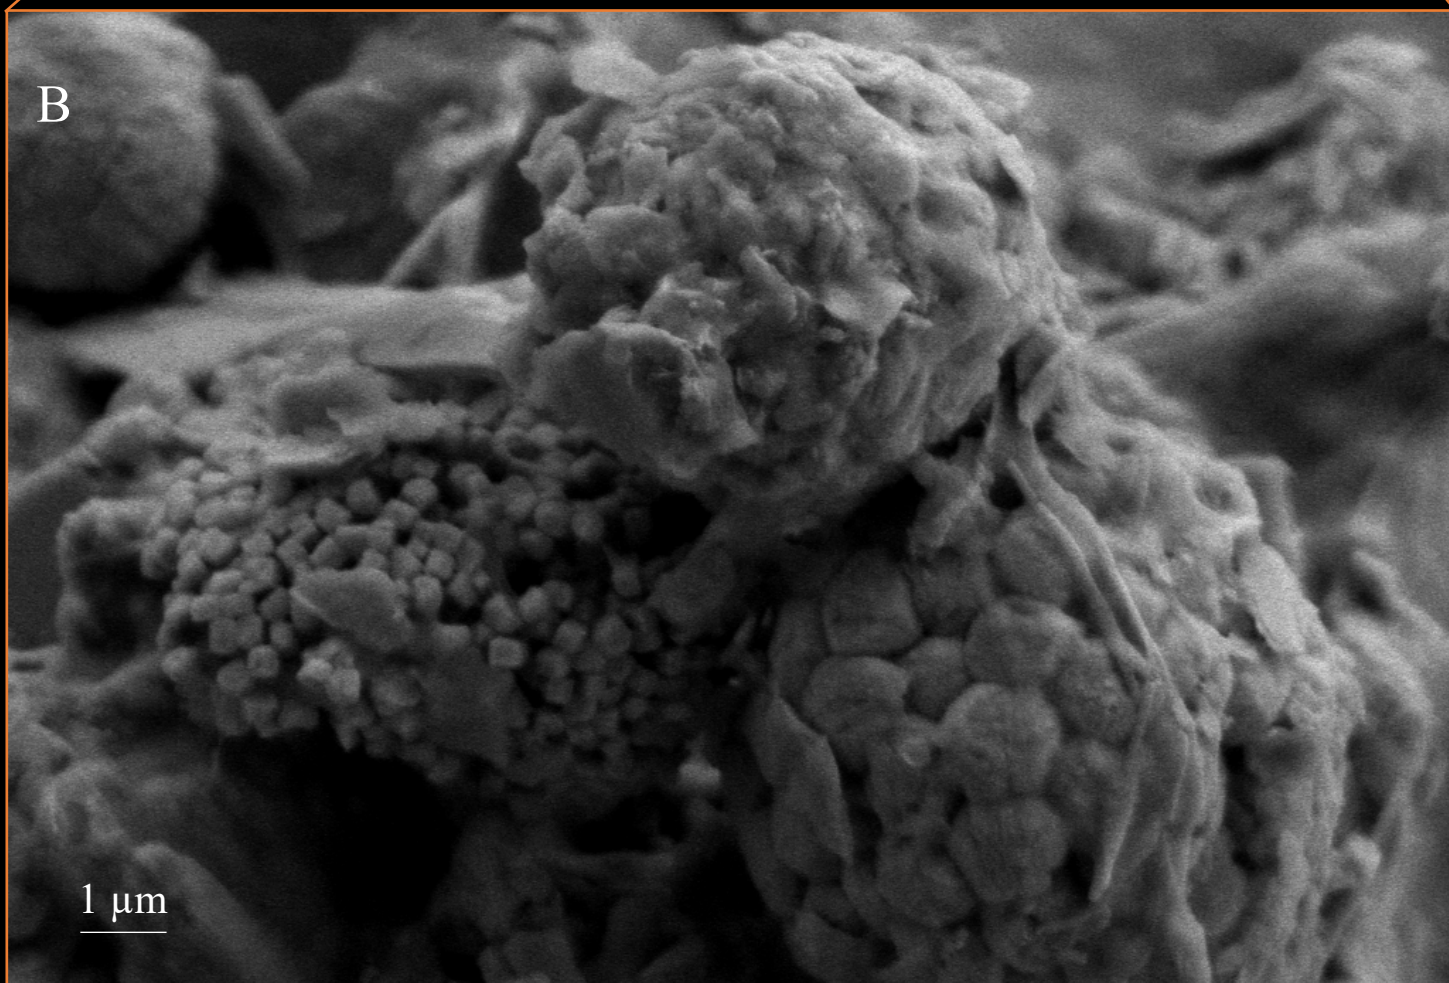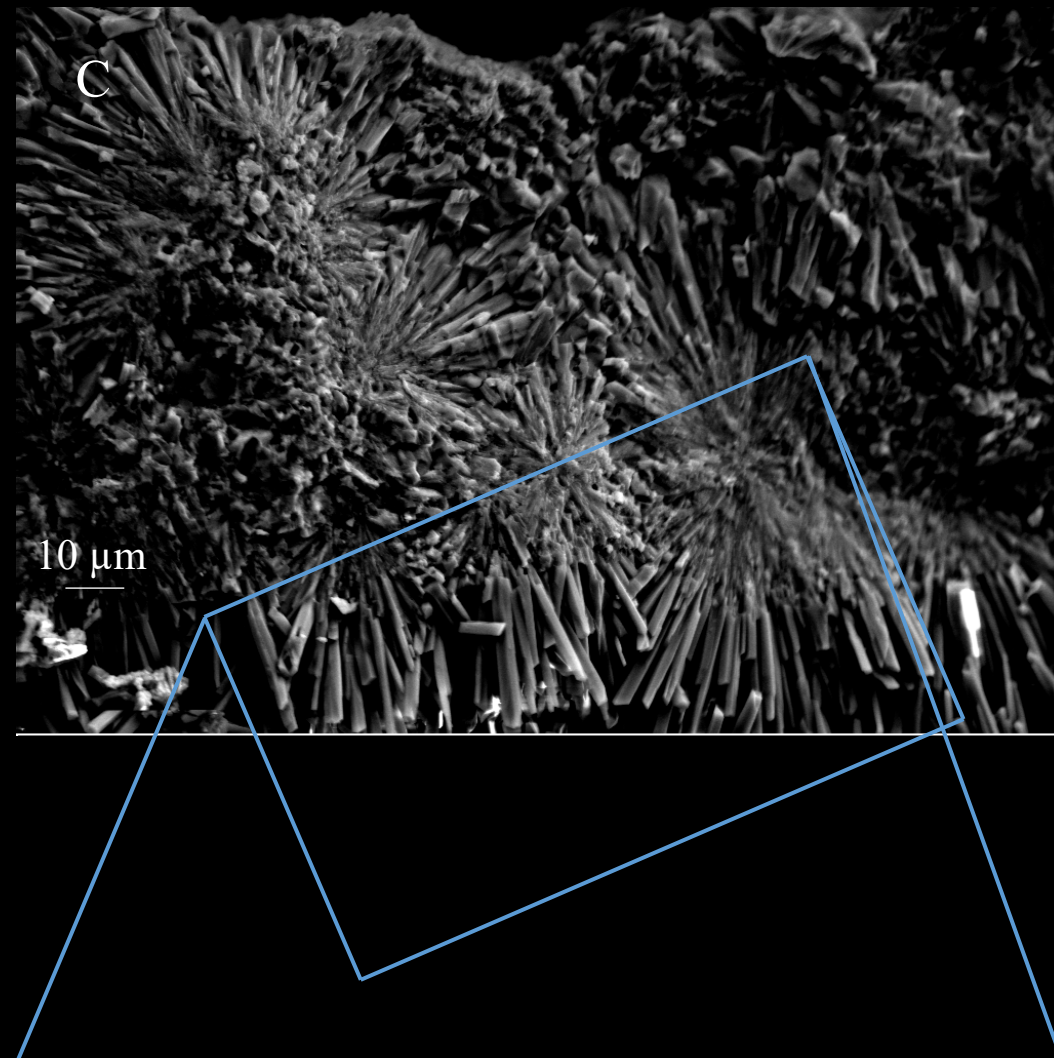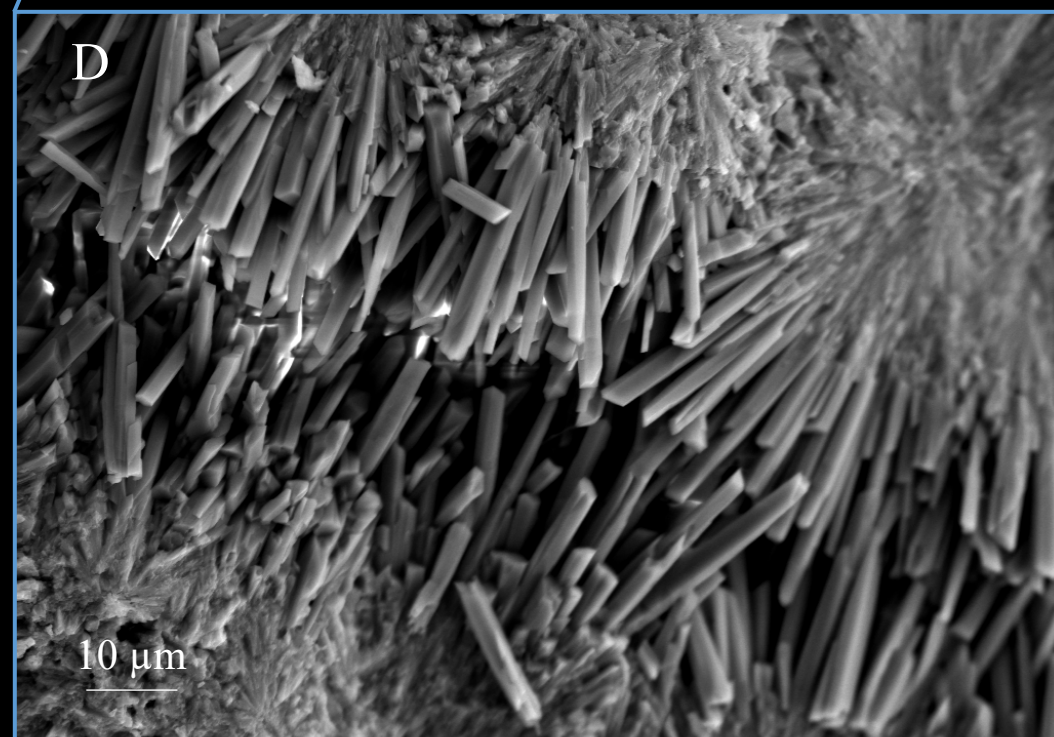

Figure S8

Negative control: non338 probe

Negative control: no probes

Reflected Light

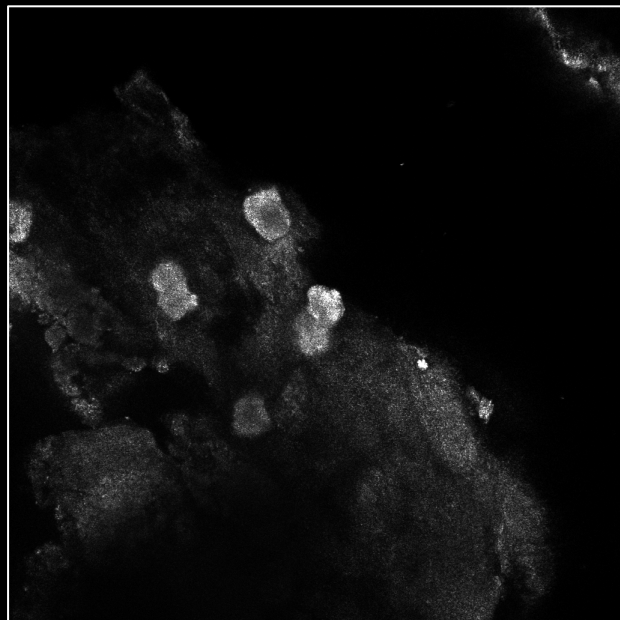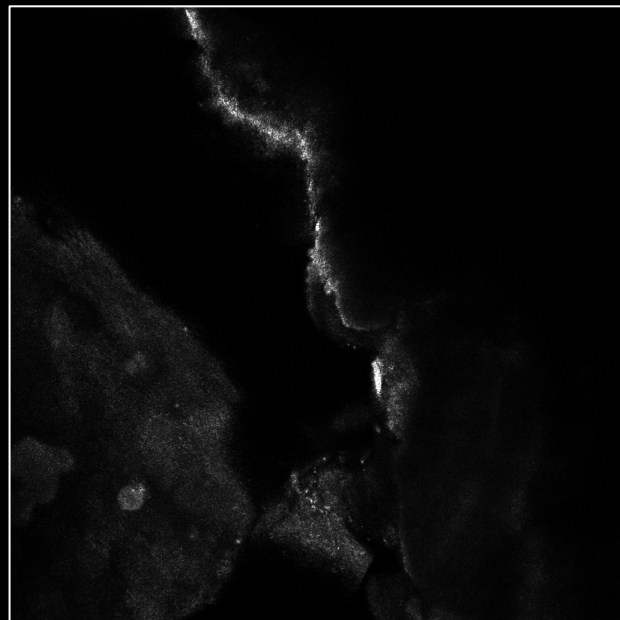

Reflected Light and Fluorescent Channels  
Arch915 // DSS658

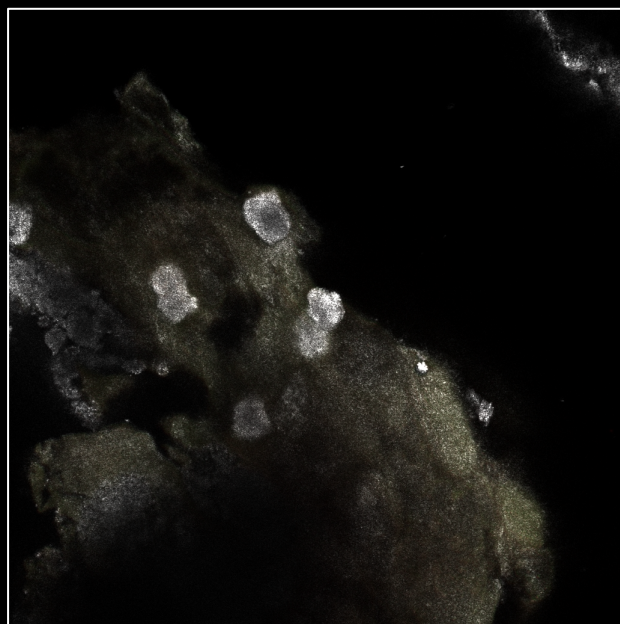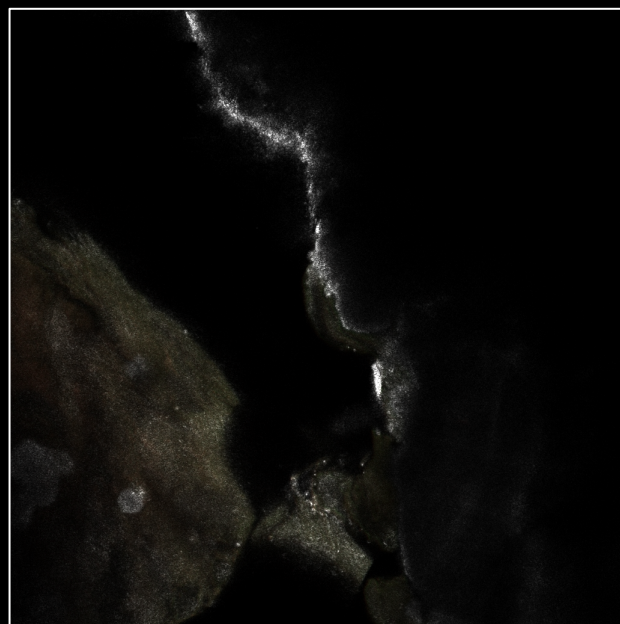

50  $\mu$ m

# Amplicon Similarity to Sequence Database (BLAST search against SILVA v128)

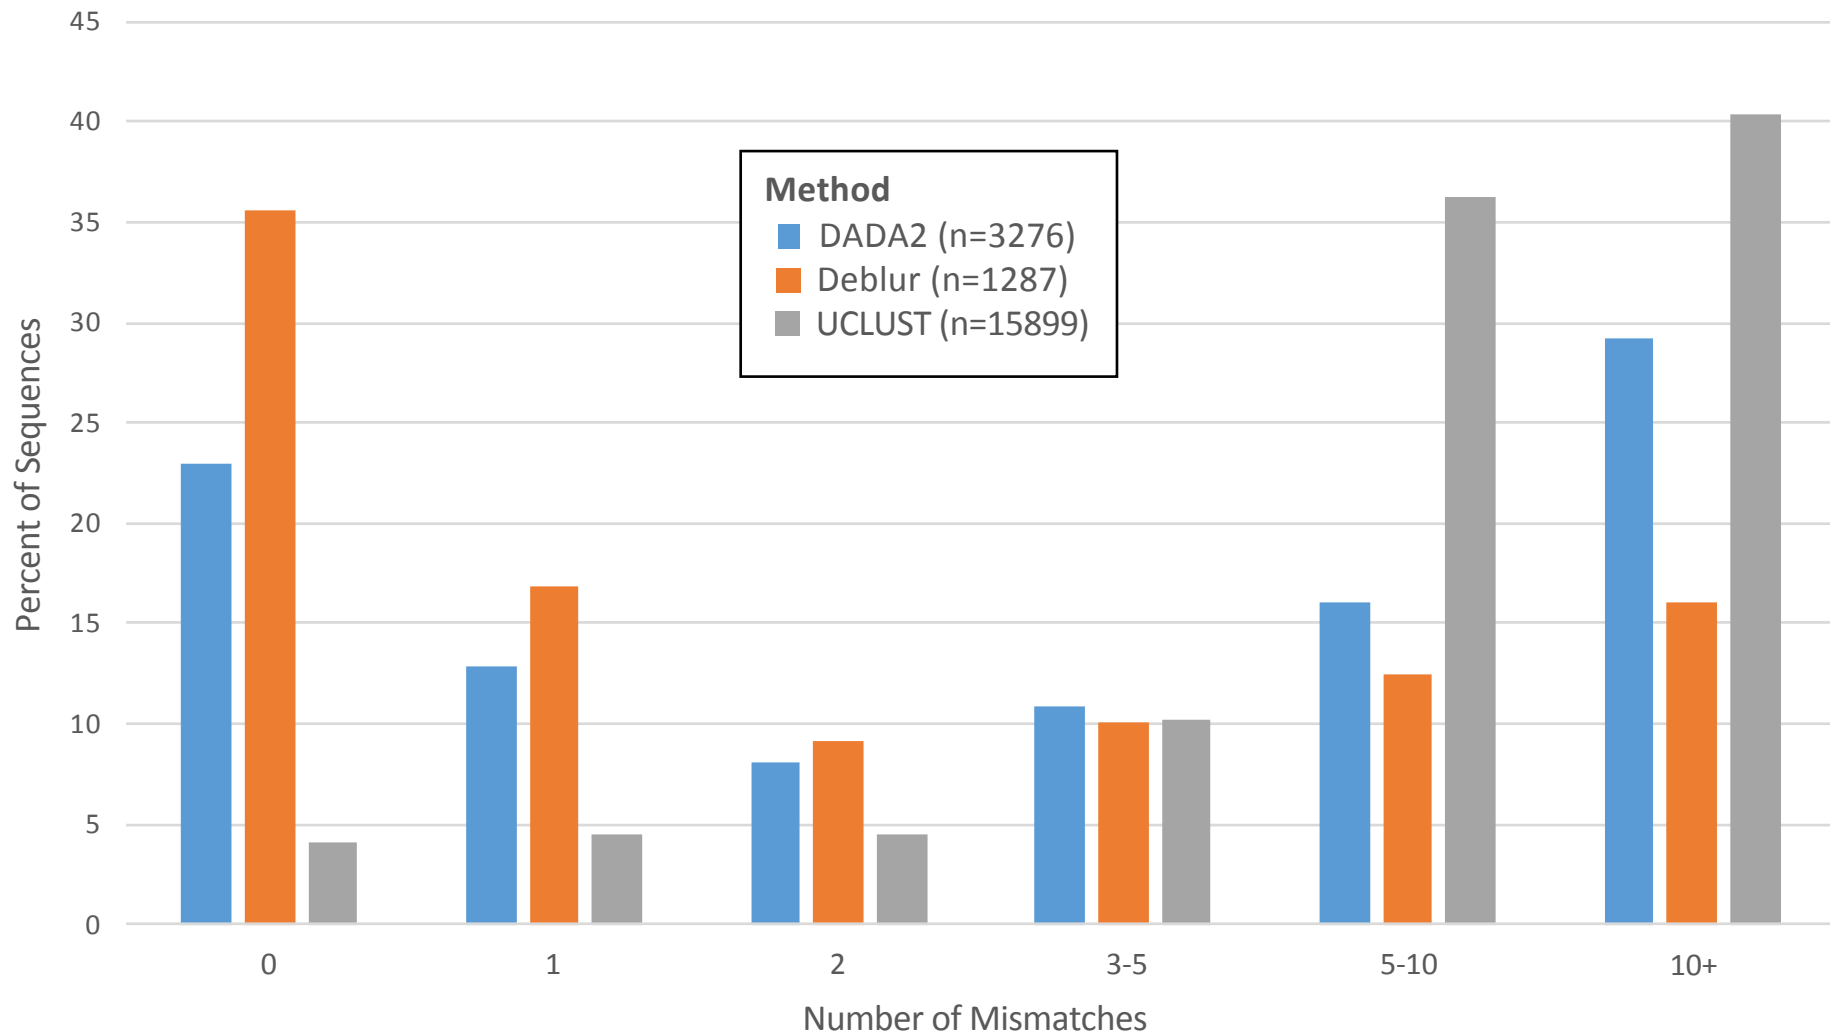

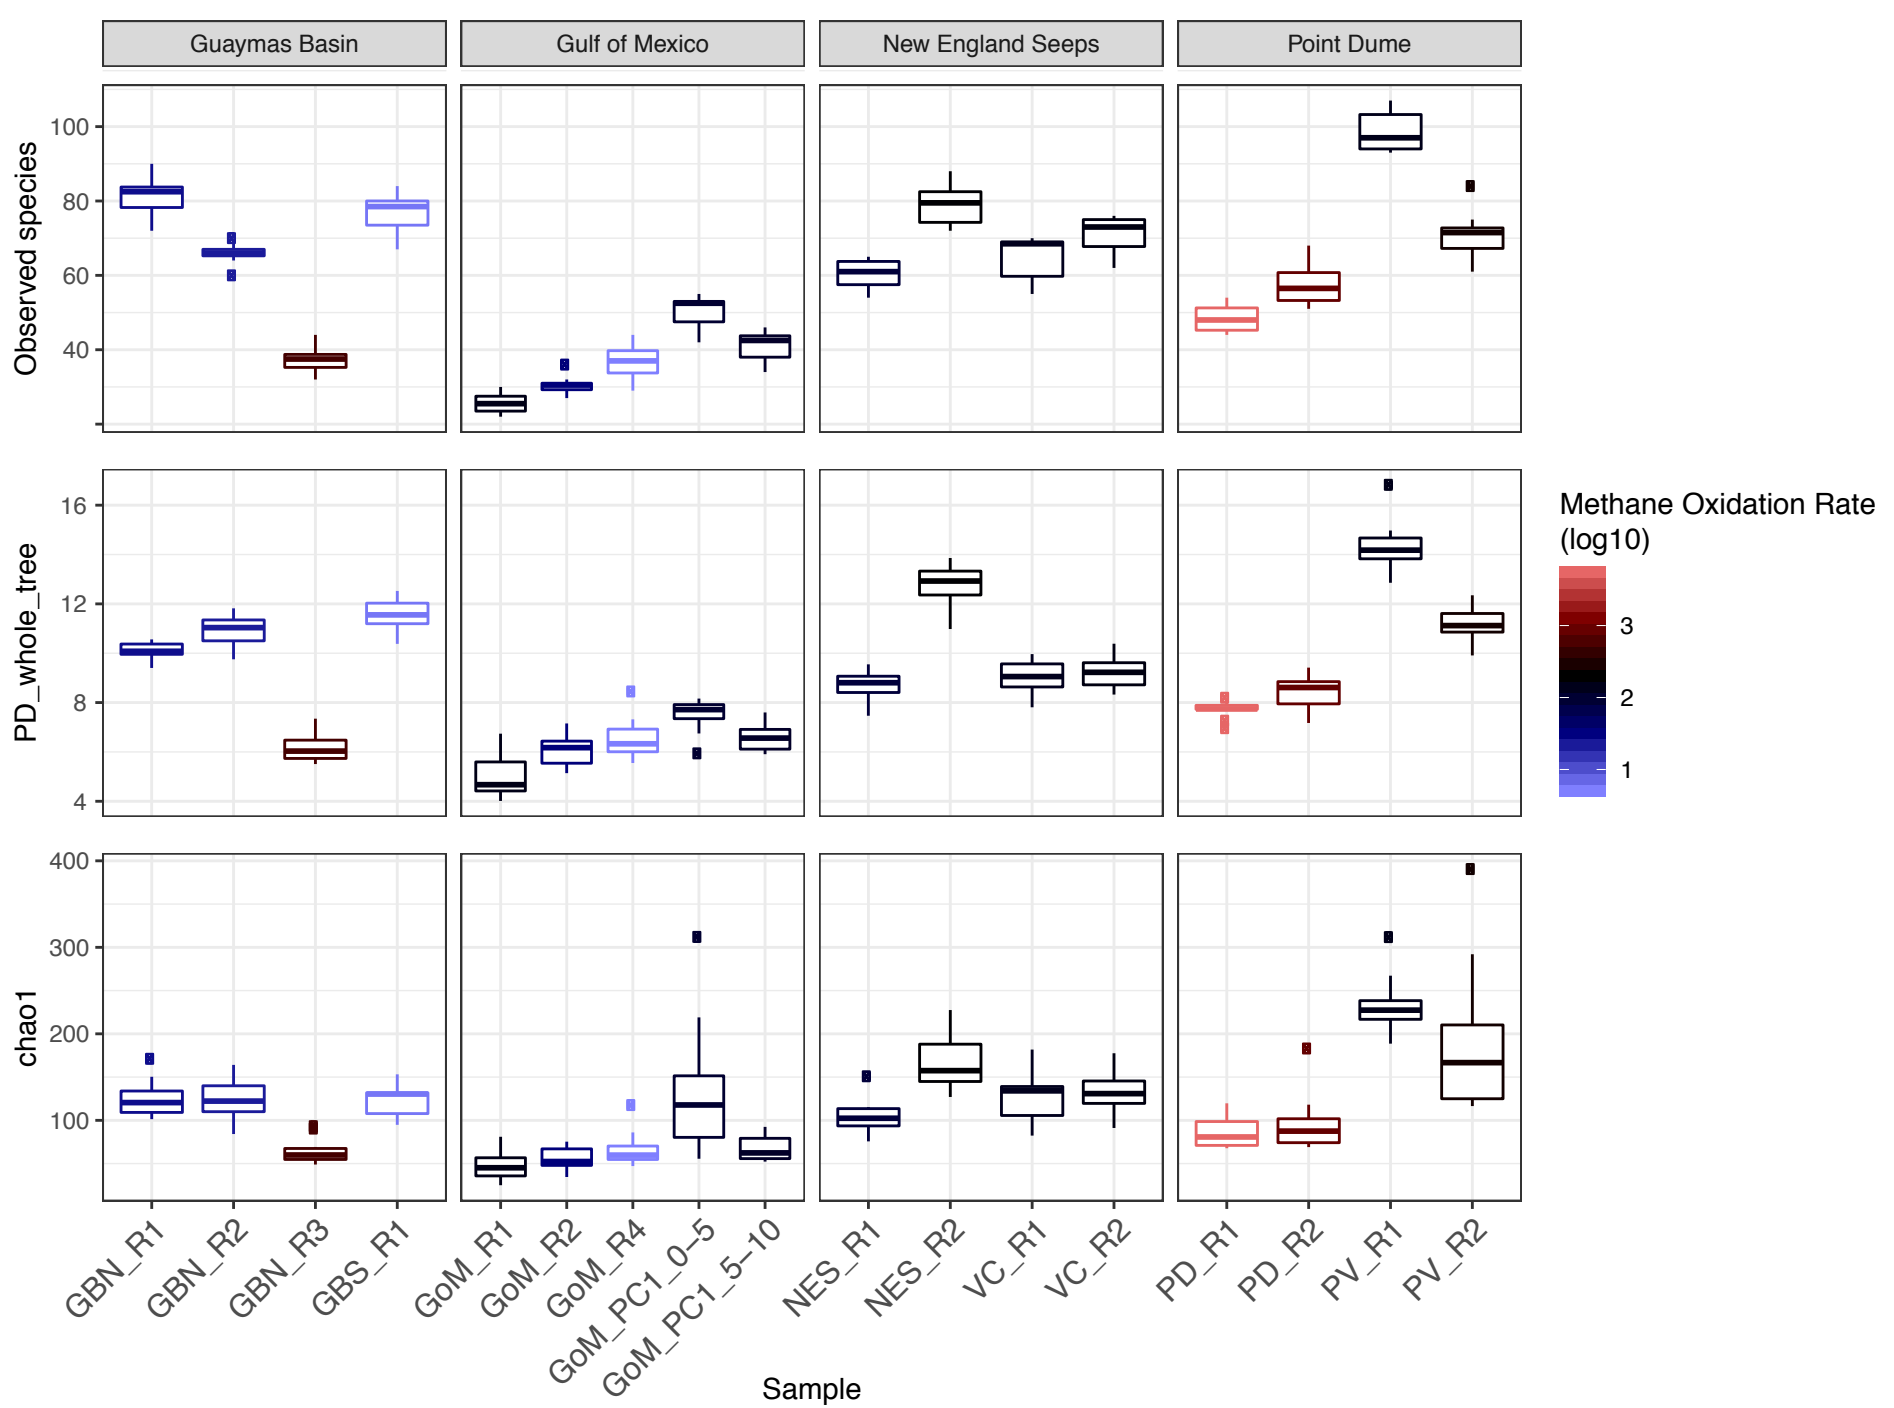

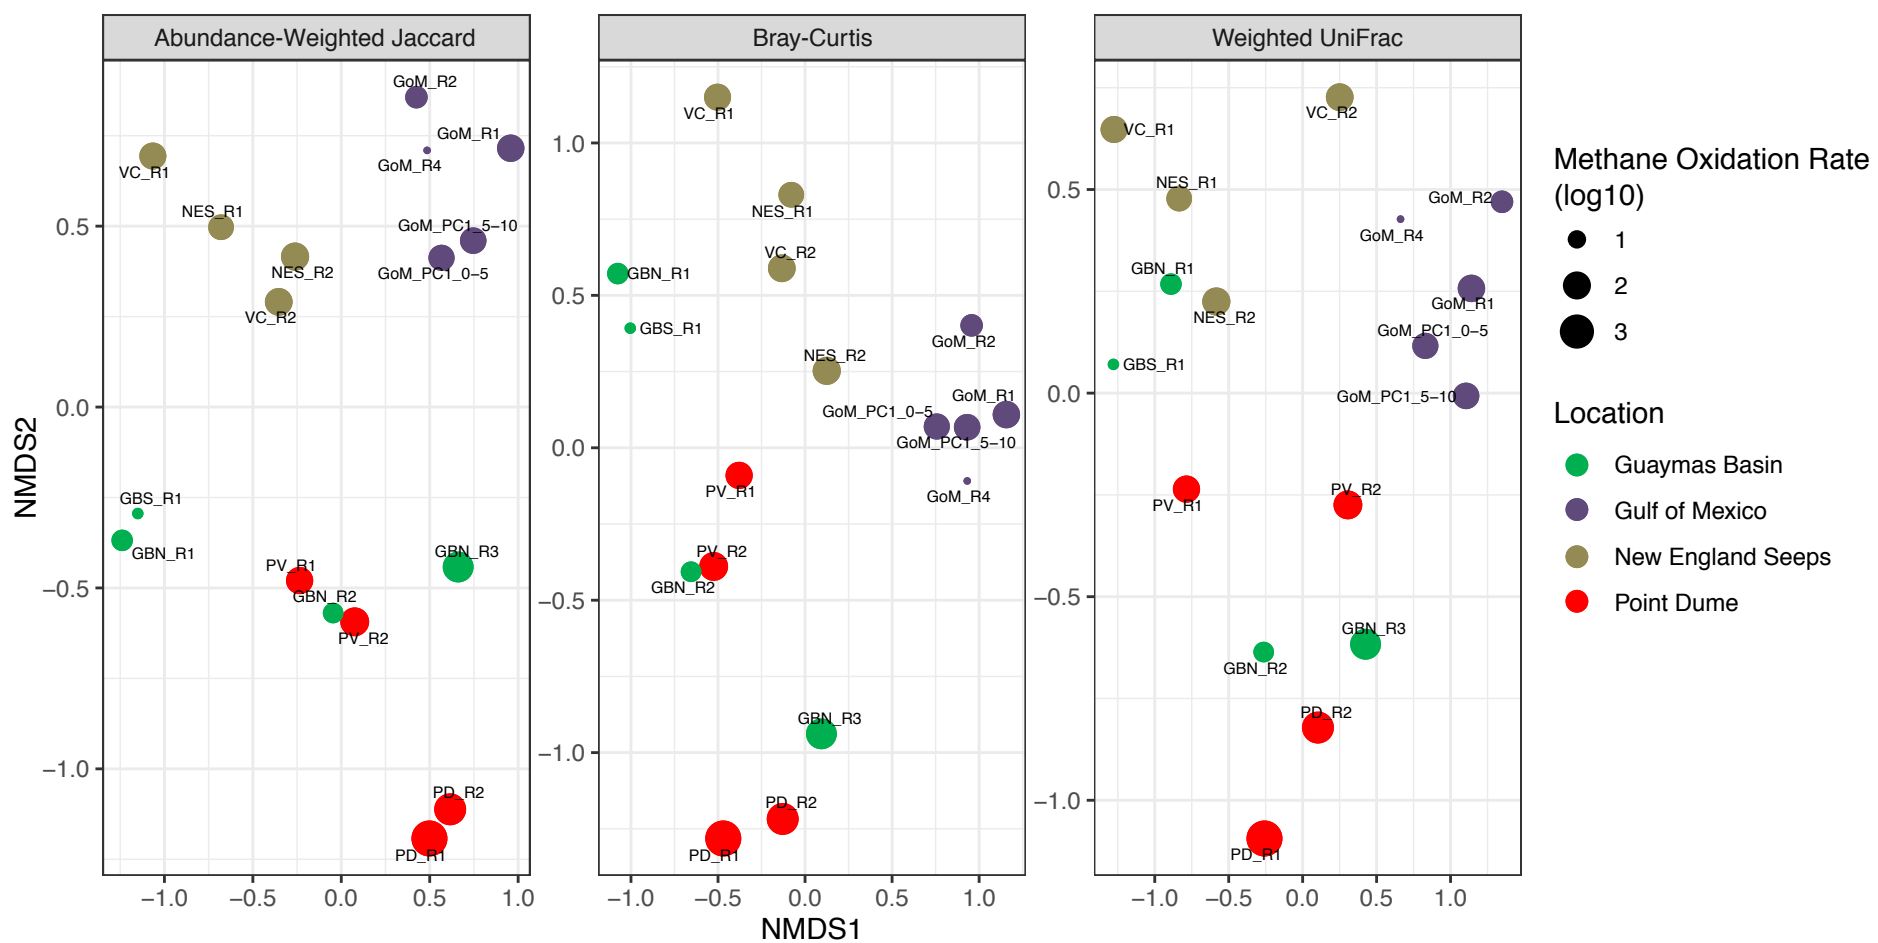

Table S1: AOM rate data from the side-by-side incubations using radiolabeled  $^{14}\text{C}\text{H}_4$  and the  $\text{CH}_3\text{D}$  method. The sample-specific conversion factors, shown with their associated standard errors, were then applied to other samples'  $\text{CH}_3\text{D}$ -derived results to produce an "apparent",  $^{14}\text{C}$ -equivalent, rate of AOM.

| Sample Name   | Incubation Time (d) | AOM Rate with $^{14}\text{C}\text{H}_4$ | AOM Rate with $\text{CH}_3\text{D}$ | D/H : $^{14}\text{C}$ ratio | Mean D/H : $^{14}\text{C}$ ratio conversion factor (SE) | Samples to which Conversion Factor was Applied |
|---------------|---------------------|-----------------------------------------|-------------------------------------|-----------------------------|---------------------------------------------------------|------------------------------------------------|
| GoM R3a       | 3.125               | 879.86                                  | 1462.5                              | 1.66                        | 1.64 (0.06)                                             | GoM R1, GoM R2, GoM R4                         |
| GoM R3b       | 3.125               | 1121.48                                 | 1723.3                              | 1.54                        |                                                         |                                                |
| GoM R3c       | 3.125               | 1143.48                                 | 1976.8                              | 1.73                        |                                                         |                                                |
| GoM PC2 5-10a | 0.73                | 773.55                                  | 1702.7                              | 2.2                         | 2.14 (0.05)                                             | GoM PC1 0-5, GoM PC1 5-10                      |
| GoM PC2 5-10b | 0.73                | 641.68                                  | 1396.8                              | 2.18                        |                                                         |                                                |
| GoM PC2 5-10c | 0.73                | 1097.75                                 | 2239.3                              | 2.04                        |                                                         |                                                |
| VC R1a        | 3.375               | 175.02                                  | 357.7                               | 2.04                        | 2.03 (0.05)                                             | VC R2                                          |
| VC R1b        | 3.375               | 173.42                                  | 367                                 | 2.12                        |                                                         |                                                |
| VC R1c        | 3.375               | 121.08                                  | 234.5                               | 1.94                        |                                                         |                                                |
| NES R1a       | 3.375               | 115.46                                  | 229.81                              | 1.99                        | 1.96 (0.04)                                             | NES R2                                         |
| NES R1b       | 3.375               | 87.18                                   | 167.5                               | 1.92                        |                                                         |                                                |
| GBN R1a       | 3.375               | 24.16                                   | 50.1                                | 2.07                        | 1.99 (0.09)                                             | GBN R2, GBN R3, GBN PC1, GBS R1                |
| GBN R1b       | 3.375               | -3.98                                   | 20                                  | NA                          |                                                         |                                                |
| GBN R1c       | 3.375               | 73.51                                   | 139.4                               | 1.9                         |                                                         |                                                |
| PD R4a        | 0.73                | 3056.81                                 | 5864.2                              | 1.92                        | 1.82 (0.06)                                             | PV R1, PV R2, PD R1, PD R2, PD R3              |
| PD R4b        | 0.73                | 3610.67                                 | 6217.9                              | 1.72                        |                                                         |                                                |
| PD R4c        | 0.73                | 3572.69                                 | 6533.3                              | 1.83                        |                                                         |                                                |
| PD PC2 0-5a   | 3.125               | 451.06                                  | 855.3                               | 1.9                         | 1.97 (0.04)                                             | PD PC1 0-5                                     |
| PD PC2 0-5b   | 3.125               | 518.05                                  | 1020.7                              | 1.97                        |                                                         |                                                |
| PD PC2 0-5c   | 3.125               | 595.56                                  | 1222.7                              | 2.05                        |                                                         |                                                |

Table S2: Mean methane oxidation rates and mineral phases of the samples analyzed in this study.

| Geological Setting            | Sample ID        | Mean Short-term Methane Oxidation Rate (nmol / cm <sup>3</sup> d) | Mineral Phases from XRD |                                                       |                                                            |
|-------------------------------|------------------|-------------------------------------------------------------------|-------------------------|-------------------------------------------------------|------------------------------------------------------------|
|                               |                  |                                                                   | Major (> 25%)           | Moderate (5-25%)                                      | Minor (< 5%)                                               |
| Sedimentary Basin             | GoM R1           | 150.22                                                            | Mg calcite, quartz      | chlorite, pyrite                                      | dolomite                                                   |
|                               | GoM R2           | 34.09                                                             | Mg calcite              | aragonite, quartz, greigite, illite, hydrotalcite     |                                                            |
|                               | GoM R4           | 5                                                                 | Mg calcite, illite      | quartz                                                |                                                            |
|                               | GoM PC1 0-5      | 98.21                                                             | Mg calcite, illite      | quartz                                                |                                                            |
|                               | GoM PC1 5-10     | 111.1                                                             | Mg calcite, illite      | plagioclase, quartz                                   | hydrotalcite                                               |
| Passive Margin                | VC R1            | 132.25                                                            | aragonite               | quartz, illite, kaolinite                             |                                                            |
|                               | VC R2            | 166.54                                                            | aragonite               | illite, quartz                                        | orthoclase, kaolinite, albite, gypsum                      |
|                               | NES R1           | 85.62                                                             | aragonite               | quartz, kaolinite, illite                             | calcite                                                    |
|                               | NES R2           | 193.23                                                            | aragonite               | quartz, illite                                        | kaolinite, orthoclase, albite                              |
| Hydrothermal Rift Basin       | GBN R1           | 26.39                                                             | amorphous silica        |                                                       |                                                            |
|                               | GBN R2           | 21.67                                                             | aragonite               |                                                       | pyrrhotite, goethite                                       |
|                               | GBN R3           | 537.75                                                            | aragonite               | orthoclase                                            | quartz, marcasite                                          |
|                               | GBN PC1          | 22.06                                                             | illite, albite          | quartz, amorphous silica                              |                                                            |
|                               | GBS R1           | 5.69                                                              | amorphous silica        | barite                                                |                                                            |
| Active Transpressional Margin | PV R1            | 140.72                                                            | feldspar                | illite, quartz, calcite, pyrite, chlorite             |                                                            |
|                               | PV R2            | 247.54                                                            | aragonite               | illite, amphibole                                     | quartz, phillipsite, greigite, chlorite                    |
|                               | PD R1 (exterior) | 5528.27                                                           | aragonite               | quartz, monohydrocalcite, amphibole, illite, chlorite | barite                                                     |
|                               | PD R1 (interior) |                                                                   | pyrite (> 80%)          | illite, quartz                                        | calcite                                                    |
|                               | PD R2            | 838.56                                                            | quartz, illite          | magnesian calcite, albite                             | aragonite, feldspar, pyrite, hydrotalcite, montmorillonite |
|                               | PD R3            | 1561.66                                                           | Mg calcite, quartz      | aragonite                                             | pyrite                                                     |
|                               | PD R4            | 2884.39                                                           | Mg calcite, albite      | pyrite, quartz                                        |                                                            |
|                               | PD PC2 0-5       | 440.73                                                            | quartz                  | illite, albite, amphibole                             | calcite                                                    |

Table S3: Conductance values for six seep samples. Conductance was calculated as the slope of a linear regression line through the -100 mV to 100 mV I-V data points for each sample.

| <b>Bulk Sediment Sample</b> | <b>Conductance (<math>\Omega^{-1}</math>)</b> | <b>Mean Methane Oxidation Rate (nmol / cm<sup>3</sup> d)</b> |
|-----------------------------|-----------------------------------------------|--------------------------------------------------------------|
| GoM PC1 0-5                 | 3.00x10 <sup>-9</sup>                         | 98.2                                                         |
| PD R2                       | 1.73x10 <sup>-9</sup>                         | 838.6                                                        |
| PD R3                       | 1.71x10 <sup>-9</sup>                         | 1561.7                                                       |
| PD PC2 0-5                  | 1.54x10 <sup>-9</sup>                         | 440.7                                                        |
| GBN R1                      | 1.24x10 <sup>-9</sup>                         | 26.4                                                         |
| GoM R1                      | 7.32x10 <sup>-10</sup>                        | 150.2                                                        |



Table S4: Methane oxidation rates of incubations using a range of particle sizes of the PD R3 carbonate rock. Experiments were performed in triplicate, and kept at 4 °C for 8 days. Values were measured using the CH<sub>3</sub>D approach and corrected to apparent rates using the site specific <sup>14</sup>C rate conversion factor from Table S2. Note: "a/c" refers to the autoclaved negative control sample.

| <b>Sample</b> | <b>Mean Fragment Size (µm)</b> | <b>Mean Apparent AOM Rate (Standard Deviation; all values in nmol / cm<sup>3</sup> d)</b> |
|---------------|--------------------------------|-------------------------------------------------------------------------------------------|
| PD R3 (A)     | 20,000 - 25,000                | 1099.89 (179.95, n=3)                                                                     |
| PD R3 (B)     | 5,000 - 7,000                  | 1051.1 (435.8, n=3)                                                                       |
| PD R3 (C)     | ~2,000                         | 1180.11 (123.22, n=3)                                                                     |
| PD R3 (D)     | ~400                           | 1089.89 (251.26, n=3)                                                                     |
| PD R3 (a/c)   | 20,000 - 25,000                | -47.69 (12.3, n=3)                                                                        |

Table S5: Cell abundance values derived from DAPI counts of selected sediment and rock samples before and after the long-term incubation experiments.

| Sample     | Mean Methane Oxidation Rate (nmol / cm <sup>3</sup> d) | Cell Abundance (# / cm <sup>3</sup> substrate) |                 | Change in Cell Abundance (#/cm <sup>3</sup> substrate) |
|------------|--------------------------------------------------------|------------------------------------------------|-----------------|--------------------------------------------------------|
|            |                                                        | Pre-Incubation                                 | Post-Incubation |                                                        |
| PD R4      | 2884.39                                                | 6.20E+08                                       | 1.24E+09        | 6.20E+08                                               |
| PD R1      | 5528.27                                                | 3.89E+08                                       | 8.77E+08        | 4.88E+08                                               |
| GoM R3     | 885.81                                                 | 4.88E+08                                       | 7.35E+08        | 2.47E+08                                               |
| PD R3      | 1561.66                                                | 2.21E+08                                       | 5.91E+08        | 3.70E+08                                               |
| PD PC2 0-5 | 440.73                                                 | 1.27E+08                                       | 4.86E+08        | 3.59E+08                                               |
| VC R1      | 132.25                                                 | 3.07E+08                                       | 2.85E+08        | -2.20E+07                                              |
| GBN R3     | 537.75                                                 | NA                                             | 2.10E+08        | NA                                                     |
| GBN PC1    | 22.06                                                  | 2.08E+08                                       | 1.63E+08        | -4.55E+07                                              |
| PV R1      | 140.72                                                 | 1.51E+08                                       | 1.48E+08        | -3.00E+06                                              |
| NES R1     | 85.62                                                  | 1.89E+08                                       | 1.13E+08        | -7.60E+07                                              |
| GBN R1     | 26.39                                                  | 1.13E+08                                       | 8.09E+07        | -3.21E+07                                              |
| GoM R1     | 150.22                                                 | NA                                             | 8.01E+07        | NA                                                     |

Table S6: Results of PERMANOVA statistical test of samples by location, lithology, mineralogy, and categorized methane oxidation rates. \*Note: Values used to categorize methane oxidation rate measurements: high: 1000+, med-high: 500-1000, med: 50-499, low: <50.

| <b>Distance metric</b> | <b>Location</b> | <b>Mineralogy</b> | <b>Lithology</b> | <b>Methane Oxidation Rate*</b> |
|------------------------|-----------------|-------------------|------------------|--------------------------------|
| Jaccard (binary)       | 0.001           | 0.01              | 0.027            | 0.004                          |
| Bray Curtis            | 0.001           | 0.036             | 0.04             | 0.018                          |
| UniFrac (unweighted)   | 0.001           | 0.008             | 0.103            | 0.01                           |

Table S7: Results of Mantel correlation tests with methane oxidation rate as the categorical variable.

| <b>Distance metric</b> | <b>r statistic</b> | <b>p-value</b> |
|------------------------|--------------------|----------------|
| Jaccard (binary)       | 0.192              | 0.01           |
| Bray Curtis            | 0.169              | 0.067          |
| UniFrac (unweighted)   | 0.281              | 0.002          |

Table S8: Headspace composition introduced to reach the designated dissolved methane concentration at 7.58 MPa. \*Note: methane consisted of 50% CH<sub>4</sub> and 50% CH<sub>3</sub>D by volume.

| <b>Dissolved methane concentration at 7.58 MPa</b> | <b>Proportion of methane* in headspace (balance nitrogen)</b> | <b>Overall quantity of methane (nmol)</b> |
|----------------------------------------------------|---------------------------------------------------------------|-------------------------------------------|
| 129 mM                                             | 100.0%                                                        | 4.5E+06                                   |
| 86.0 mM                                            | 66.7%                                                         | 3.0E+06                                   |
| 43.0 mM                                            | 33.3%                                                         | 1.5E+06                                   |
| 25.8 mM                                            | 20.0%                                                         | 8.9E+05                                   |
| 17.2 mM                                            | 13.3%                                                         | 5.9E+05                                   |
| 9.7 mM                                             | 7.5%                                                          | 3.3E+05                                   |
| 6.5 mM                                             | 5.0%                                                          | 2.2E+05                                   |
| 4.3 mM                                             | 3.3%                                                          | 1.5E+05                                   |
| 1.1 mM                                             | 0.9%                                                          | 4.0E+04                                   |

Table S9: Sechenov equation parameters for methane and the ions found in seawater.  $c_i$  values are derived from ion abundances reported in Millero et al., 2008, and seawater density at 4 °C was calculated per Millero & Poisson, 1981.  $h_i$  and  $h_g$  values are from Weisenberger & Schumpe, 1996. Ions for which no  $h_i$  was available were not included in the calculation.

| Ion                             | $c_i$ (mol / L)               | $h_i$ (m <sup>3</sup> / kmol) |
|---------------------------------|-------------------------------|-------------------------------|
| Na <sup>+</sup>                 | 4.82E-01                      | 0.1143                        |
| Mg <sup>2+</sup>                | 5.43E-02                      | 0.1694                        |
| Ca <sup>2+</sup>                | 1.06E-02                      | 0.1762                        |
| K <sup>+</sup>                  | 1.05E-02                      | 0.0922                        |
| Sr <sup>2+</sup>                | 9.31E-05                      | 0.1881                        |
| Cl <sup>-</sup>                 | 5.61E-01                      | 0.0318                        |
| SO <sub>4</sub> <sup>2-</sup>   | 2.90E-02                      | 0.1117                        |
| HCO <sub>3</sub> <sup>-</sup>   | 1.76E-03                      | 0.0967                        |
| Br <sup>-</sup>                 | 8.65E-04                      | 0.0269                        |
| CO <sub>3</sub> <sup>2-</sup>   | 2.45E-04                      | 0.1423                        |
| B(OH) <sub>4</sub> <sup>-</sup> | 1.03E-04                      | NA                            |
| F <sup>-</sup>                  | 7.02E-05                      | 0.092                         |
| OH <sup>-</sup>                 | 8.19E-06                      | NA                            |
|                                 |                               |                               |
| Gas Species                     | $h_g$ (m <sup>3</sup> / kmol) |                               |
| CH <sub>4</sub>                 | 0.0022                        |                               |
